# Supplementary material for: Use of Rapid COVID-19 Antibody Testing to Evaluate Relative Risk of Infection in Campus Versus Non-campus Residents at a Government Institution in Saudi Arabia: a Cohort Study
Source: Research Square preprint supplement (doi:10.21203/rs.3.rs-264292/v1), 2021-03-10
Supplement: Supplementary file 1 [file 37a5e707d806c64acbd617e8.xlsx]

## Sheet: All patient critical data
Campus Resident	Age (Years)	Gender	Nationality	Blood Type	Height (cm)	Weight (kg)	Body Temperature (Celsius)	Heart Rate (BPM)	Blood Pressure Systolic	Blood Pressure Diastolic	IgG Antibody Results	IgM Antibody Results	Fever	Difficulty Breathing	Loss Of Sense	Muscle Fatigue	Hypertension	Obesity	Diabetes	Asthma	Contact_COVID-19	Covid-19+
No	31	Female	Saudi	O+	158	62	36	92	98	61	Negative	Negative	FALSE	FALSE	FALSE	FALSE	FALSE	FALSE	FALSE	FALSE	FALSE	No
No	40	Female	Non-Saudi	O+	159	58	36	82	110	68	Negative	Negative	FALSE	FALSE	FALSE	FALSE	FALSE	FALSE	FALSE	FALSE	FALSE	No
No	33	Female	Non-Saudi	O+	155	55	36	72	105	65	Negative	Negative	FALSE	FALSE	FALSE	FALSE	FALSE	FALSE	FALSE	FALSE	FALSE	No
No	40	Male	Non-Saudi	O+	168	72	37	84	128	83	Negative	Negative	FALSE	FALSE	FALSE	FALSE	FALSE	FALSE	FALSE	FALSE	FALSE	No
No	49	Male	Non-Saudi	A+	165	75	37	84	139	85	Negative	Negative	FALSE	FALSE	FALSE	FALSE	FALSE	FALSE	FALSE	FALSE	FALSE	No
No	47	Female	Non-Saudi	B+	152	60	36	75	109	69	Negative	Negative	FALSE	FALSE	FALSE	FALSE	FALSE	FALSE	FALSE	FALSE	FALSE	No
No	62	Female	Non-Saudi	B+	156	54	37	76	138	89	Negative	Positive	FALSE	FALSE	FALSE	FALSE	TRUE	FALSE	FALSE	FALSE	FALSE	No
No	54	Male	Non-Saudi	B+	157	62	37	89	145	84	Positive	Positive	FALSE	FALSE	TRUE	FALSE	FALSE	FALSE	FALSE	FALSE	FALSE	No
No	41	Male	Non-Saudi	B+	160	78	37	89	139	83	Negative	Negative	FALSE	FALSE	FALSE	FALSE	FALSE	FALSE	FALSE	FALSE	FALSE	No
No	42	Male	Non-Saudi	A+	153	69	37	92	138	86	Positive	Positive	FALSE	FALSE	FALSE	TRUE	FALSE	FALSE	FALSE	FALSE	FALSE	No
No	35	Male	Non-Saudi	O-	152	56	37	86	122	84	Negative	Negative	FALSE	FALSE	FALSE	FALSE	FALSE	FALSE	FALSE	FALSE	FALSE	No
No	35	Male	Non-Saudi	A+	162	60	37	89	128	81	Negative	Negative	FALSE	FALSE	FALSE	FALSE	FALSE	FALSE	FALSE	FALSE	FALSE	No
No	45	Female	Non-Saudi	A+	147	50	37	92	148	92	Negative	Negative	FALSE	FALSE	FALSE	FALSE	FALSE	FALSE	FALSE	FALSE	FALSE	No
No	33	Female	Non-Saudi	O+	168	80	37	78	123	82	Negative	Negative	FALSE	FALSE	FALSE	FALSE	FALSE	FALSE	FALSE	FALSE	FALSE	No
No	40	Male	Non-Saudi	O+	160	82	37	82	134	91	Negative	Negative	FALSE	FALSE	FALSE	FALSE	FALSE	FALSE	FALSE	FALSE	FALSE	No
Yes	35	Female	Non-Saudi	A-	155	66	37	89	123	74	Negative	Negative	FALSE	FALSE	FALSE	FALSE	FALSE	FALSE	FALSE	FALSE	FALSE	No
Yes	45	Female	Non-Saudi	O+	155	66	37	78	122	80	Positive	Positive	FALSE	FALSE	TRUE	FALSE	TRUE	FALSE	FALSE	FALSE	TRUE	No
No	26	Female	Saudi	A+	164	62	37	96	131	86	Negative	Negative	FALSE	FALSE	FALSE	FALSE	FALSE	FALSE	FALSE	FALSE	FALSE	No
No	29	Female	Non-Saudi	O+	160	52	37	78	123	78	Negative	Negative	FALSE	FALSE	FALSE	FALSE	FALSE	FALSE	FALSE	FALSE	FALSE	No
Yes	37	Female	Saudi	O+	165	89	37	73	120	79	Negative	Negative	FALSE	FALSE	FALSE	FALSE	FALSE	FALSE	FALSE	FALSE	FALSE	No
No	27	Female	Saudi	O+	167	61	37	73	105	66	Negative	Negative	FALSE	FALSE	FALSE	FALSE	FALSE	FALSE	FALSE	FALSE	FALSE	No
Yes	35	Female	Saudi	O-	160	82	37	92	136	88	Negative	Negative	FALSE	FALSE	FALSE	FALSE	FALSE	FALSE	FALSE	FALSE	FALSE	No
No	55	Male	Saudi	O+	172	98	37	72	145	73	Negative	Negative	FALSE	FALSE	FALSE	FALSE	FALSE	FALSE	FALSE	FALSE	FALSE	No
No	55	Male	Saudi	A+	170	76	37	69	135	76	Negative	Negative	FALSE	FALSE	FALSE	FALSE	FALSE	FALSE	FALSE	FALSE	FALSE	No
No	43	Male	Saudi	O-	181	98	36	90	176	114	Negative	Negative	FALSE	FALSE	FALSE	FALSE	FALSE	FALSE	FALSE	FALSE	TRUE	No
No	34	Male	Saudi	A+	159	68	36	69	139	66	Negative	Negative	FALSE	FALSE	FALSE	FALSE	FALSE	FALSE	FALSE	FALSE	FALSE	No
No	45	Male	Saudi	O+	172	85	37	79	107	65	Negative	Negative	FALSE	FALSE	FALSE	FALSE	FALSE	FALSE	FALSE	FALSE	FALSE	No
No	45	Male	Saudi	O+	171	75	37	73	118	75	Negative	Negative	FALSE	FALSE	FALSE	FALSE	FALSE	FALSE	FALSE	FALSE	FALSE	No
No	52	Male	Non-Saudi	B+	165	55	37	93	166	95	Negative	Negative	FALSE	FALSE	FALSE	FALSE	TRUE	FALSE	TRUE	FALSE	FALSE	No
No	37	Male	Saudi	B+	179	121	37	71	132	100	Negative	Negative	FALSE	FALSE	FALSE	FALSE	FALSE	TRUE	FALSE	FALSE	FALSE	No
No	33	Male	Saudi	O+	172	80	37	66	121	85	Negative	Negative	FALSE	FALSE	FALSE	FALSE	FALSE	FALSE	FALSE	FALSE	FALSE	No
No	42	Male	Saudi	AB+	180	79	36	68	113	72	Negative	Negative	FALSE	FALSE	FALSE	FALSE	FALSE	FALSE	FALSE	FALSE	TRUE	No
No	57	Male	Saudi	O+	169	77	36	75	137	79	Negative	Negative	TRUE	FALSE	FALSE	TRUE	TRUE	FALSE	TRUE	FALSE	TRUE	Yes
No	42	Male	Saudi	A+	164	82	36	81	135	89	Negative	Negative	FALSE	FALSE	FALSE	FALSE	FALSE	FALSE	FALSE	FALSE	FALSE	No
No	32	Male	Saudi	B-	164	67	36	65	144	90	Negative	Negative	FALSE	FALSE	FALSE	FALSE	FALSE	FALSE	FALSE	TRUE	FALSE	No
No	33	Male	Saudi	AB+	176	60	36	90	106	67	Negative	Negative	TRUE	TRUE	TRUE	FALSE	FALSE	FALSE	FALSE	FALSE	TRUE	No
No	43	Male	Saudi	A+	180	100	36	80	138	73	Negative	Negative	FALSE	FALSE	FALSE	FALSE	FALSE	TRUE	FALSE	FALSE	FALSE	No
No	58	Male	Saudi	O+	186	89	36	79	140	86	Negative	Negative	TRUE	TRUE	FALSE	TRUE	FALSE	TRUE	FALSE	TRUE	FALSE	No
No	32	Male	Saudi	B+	170	82	37	84	135	84	Negative	Negative	FALSE	FALSE	FALSE	TRUE	FALSE	FALSE	FALSE	TRUE	FALSE	No
No	33	Male	Saudi	O+	168	71	36	70	132	77	Negative	Negative	FALSE	FALSE	FALSE	FALSE	TRUE	FALSE	FALSE	FALSE	FALSE	No
No	32	Male	Saudi	O+	173	72	36	73	127	99	Negative	Negative	FALSE	FALSE	FALSE	FALSE	FALSE	FALSE	FALSE	FALSE	FALSE	No
No	54	Male	Saudi	B+	160	95	36	80	155	101	Negative	Negative	FALSE	FALSE	FALSE	FALSE	FALSE	FALSE	FALSE	FALSE	FALSE	No
No	33	Male	Saudi	O+	170	78	36	74	140	68	Negative	Negative	FALSE	FALSE	FALSE	FALSE	FALSE	FALSE	FALSE	FALSE	FALSE	No
No	46	Male	Saudi	O+	181	140	36	75	173	107	Negative	Negative	FALSE	FALSE	FALSE	FALSE	FALSE	FALSE	FALSE	FALSE	FALSE	No
No	30	Male	Saudi	O+	168	87	37	66	125	84	Negative	Negative	FALSE	FALSE	FALSE	FALSE	FALSE	FALSE	FALSE	FALSE	FALSE	No
No	46	Male	Saudi	AB+	170	80	37	68	160	90	Negative	Negative	FALSE	FALSE	FALSE	FALSE	TRUE	FALSE	FALSE	FALSE	FALSE	No
No	27	Male	Saudi	O+	173	66	37	100	122	63	Negative	Negative	FALSE	FALSE	FALSE	FALSE	FALSE	FALSE	FALSE	FALSE	FALSE	No
No	39	Male	Saudi	O+	177	80	36	78	126	71	Negative	Negative	FALSE	FALSE	FALSE	FALSE	FALSE	FALSE	FALSE	FALSE	FALSE	No
No	37	Male	Saudi	O+	176	90	36	90	125	66	Negative	Negative	FALSE	FALSE	TRUE	TRUE	FALSE	FALSE	FALSE	FALSE	TRUE	Yes
Yes	27	Female	Non-Saudi	AB+	153	39	37	89	98	71	Negative	Negative	TRUE	TRUE	TRUE	FALSE	FALSE	FALSE	FALSE	FALSE	FALSE	No
No	27	Male	Saudi	O+	170	80	37	80	115	60	Negative	Negative	FALSE	FALSE	FALSE	FALSE	FALSE	FALSE	FALSE	FALSE	FALSE	No
Yes	47	Female	Non-Saudi	O+	165	71	37	91	137	87	Negative	Negative	FALSE	FALSE	FALSE	FALSE	TRUE	TRUE	FALSE	FALSE	FALSE	No
Yes	29	Female	Non-Saudi	AB+	160	53	37	63	102	65	Negative	Negative	FALSE	FALSE	TRUE	FALSE	FALSE	FALSE	FALSE	FALSE	FALSE	No
Yes	51	Female	Non-Saudi	O+	154	63	37	88	111	68	Negative	Positive	FALSE	FALSE	FALSE	TRUE	FALSE	FALSE	FALSE	FALSE	FALSE	No
No	25	Female	Saudi	O+	160	55	37	80	120	80	Negative	Negative	FALSE	FALSE	FALSE	FALSE	FALSE	FALSE	FALSE	FALSE	FALSE	No
No	53	Male	Saudi	O+	168	80	36	79	170	100	Negative	Negative	FALSE	FALSE	FALSE	FALSE	FALSE	FALSE	FALSE	FALSE	FALSE	No
No	42	Male	Saudi	O+	171	99	36	65	131	85	Negative	Negative	FALSE	FALSE	FALSE	FALSE	FALSE	TRUE	FALSE	FALSE	FALSE	No
No	44	Male	Saudi	O+	170	65	36	76	138	96	Negative	Negative	FALSE	FALSE	FALSE	FALSE	FALSE	FALSE	FALSE	FALSE	FALSE	No
No	29	Male	Saudi	AB+	169	59	36	75	112	68	Negative	Negative	FALSE	FALSE	FALSE	FALSE	FALSE	FALSE	FALSE	FALSE	FALSE	No
No	36	Male	Saudi	B+	196	65	36	121	96	66	Negative	Negative	FALSE	FALSE	FALSE	FALSE	FALSE	FALSE	FALSE	FALSE	FALSE	No
No	37	Male	Saudi	O+	172	73	36	79	115	76	Negative	Negative	TRUE	FALSE	TRUE	TRUE	FALSE	FALSE	FALSE	FALSE	FALSE	No
No	41	Male	Saudi	O+	175	80	36	79	111	79	Negative	Negative	FALSE	FALSE	FALSE	FALSE	FALSE	FALSE	FALSE	FALSE	FALSE	No
No	40	Male	Saudi	O+	163	85	36	75	131	87	Negative	Negative	FALSE	FALSE	FALSE	FALSE	FALSE	FALSE	FALSE	FALSE	FALSE	No
No	38	Male	Saudi	AB+	180	94	37	84	165	97	Negative	Negative	FALSE	FALSE	FALSE	FALSE	FALSE	FALSE	FALSE	FALSE	FALSE	No
No	50	Male	Saudi	B+	165	70	36	77	147	85	Negative	Negative	FALSE	FALSE	FALSE	FALSE	FALSE	FALSE	FALSE	FALSE	FALSE	No
No	46	Male	Saudi	O+	175	90	36	80	134	72	Negative	Negative	FALSE	FALSE	FALSE	FALSE	FALSE	FALSE	FALSE	FALSE	FALSE	No
No	49	Male	Saudi	AB+	175	73	37	81	153	94	Negative	Negative	FALSE	FALSE	FALSE	FALSE	FALSE	FALSE	FALSE	FALSE	FALSE	No
No	37	Male	Saudi	B+	178	55	36	77	127	87	Negative	Negative	FALSE	FALSE	FALSE	FALSE	FALSE	FALSE	FALSE	FALSE	FALSE	No
No	38	Male	Saudi	O+	183	88	37	76	145	86	Negative	Negative	FALSE	FALSE	FALSE	FALSE	FALSE	FALSE	FALSE	FALSE	FALSE	No
No	31	Male	Saudi	A+	174	77	37	82	110	62	Negative	Negative	TRUE	FALSE	FALSE	FALSE	FALSE	FALSE	FALSE	FALSE	FALSE	No
No	42	Male	Saudi	O+	163	85	36	93	136	77	Negative	Negative	TRUE	FALSE	FALSE	FALSE	TRUE	FALSE	TRUE	FALSE	TRUE	No
No	29	Male	Saudi	O+	165	85	36	75	131	70	Negative	Negative	FALSE	FALSE	FALSE	FALSE	FALSE	FALSE	FALSE	FALSE	FALSE	No
No	27	Male	Saudi	O+	175	84	37	96	148	93	Negative	Negative	FALSE	FALSE	FALSE	FALSE	FALSE	FALSE	FALSE	FALSE	FALSE	No
No	31	Male	Saudi	B+	168	70	37	90	141	85	Negative	Negative	FALSE	FALSE	FALSE	FALSE	FALSE	FALSE	FALSE	FALSE	FALSE	No
No	42	Male	Saudi	A+	174	78	37	70	139	80	Negative	Negative	FALSE	FALSE	FALSE	FALSE	FALSE	FALSE	FALSE	FALSE	FALSE	No
No	42	Male	Saudi	O-	170	75	37	77	141	83	Negative	Negative	FALSE	FALSE	FALSE	FALSE	FALSE	FALSE	FALSE	FALSE	FALSE	No
No	35	Male	Saudi	O+	196	130	36	78	121	77	Negative	Negative	FALSE	FALSE	FALSE	FALSE	FALSE	FALSE	FALSE	FALSE	FALSE	No
No	34	Male	Saudi	O+	180	104	37	85	134	85	Negative	Negative	FALSE	FALSE	FALSE	FALSE	FALSE	FALSE	FALSE	FALSE	FALSE	No
No	42	Male	Saudi	A+	170	85	37	100	143	79	Negative	Negative	FALSE	FALSE	FALSE	FALSE	FALSE	FALSE	FALSE	FALSE	FALSE	No
No	42	Male	Saudi	A+	170	96	37	84	136	80	Negative	Negative	FALSE	FALSE	FALSE	FALSE	FALSE	FALSE	FALSE	FALSE	FALSE	No
No	40	Male	Saudi	O+	178	130	37	72	120	90	Negative	Negative	FALSE	FALSE	FALSE	FALSE	FALSE	FALSE	FALSE	FALSE	FALSE	No
No	48	Male	Saudi	O+	175	115	37	69	150	100	Negative	Negative	FALSE	FALSE	FALSE	FALSE	FALSE	FALSE	FALSE	FALSE	FALSE	No
No	38	Male	Saudi	O+	173	70	37	71	117	84	Negative	Negative	FALSE	FALSE	FALSE	FALSE	FALSE	FALSE	FALSE	FALSE	FALSE	No
No	37	Male	Saudi	A+	169	89	37	77	134	81	Negative	Negative	FALSE	FALSE	FALSE	FALSE	FALSE	FALSE	FALSE	FALSE	FALSE	No
No	45	Male	Saudi	O+	170	70	37	90	145	124	Negative	Negative	FALSE	FALSE	FALSE	FALSE	FALSE	FALSE	FALSE	FALSE	FALSE	No
No	42	Male	Saudi	AB+	180	85	37	78	116	86	Negative	Negative	FALSE	FALSE	FALSE	FALSE	FALSE	FALSE	FALSE	FALSE	FALSE	No
No	27	Male	Saudi	B+	176	73	37	67	132	94	Negative	Negative	FALSE	FALSE	FALSE	FALSE	FALSE	FALSE	FALSE	FALSE	FALSE	No
No	44	Male	Saudi	A+	186	81	37	78	125	71	Negative	Negative	FALSE	FALSE	FALSE	FALSE	FALSE	FALSE	FALSE	FALSE	FALSE	No
No	39	Male	Saudi	O-	168	101	36	78	123	82	Negative	Negative	FALSE	FALSE	FALSE	FALSE	FALSE	TRUE	FALSE	FALSE	TRUE	No
No	38	Male	Saudi	AB+	176	74	36	90	122	72	Negative	Negative	FALSE	FALSE	FALSE	FALSE	FALSE	FALSE	FALSE	FALSE	FALSE	No
No	42	Male	Saudi	A+	169	79	36	81	169	100	Negative	Negative	FALSE	FALSE	FALSE	FALSE	FALSE	FALSE	FALSE	FALSE	FALSE	No
No	30	Male	Saudi	O+	174	99	37	86	139	85	Negative	Negative	FALSE	FALSE	FALSE	FALSE	FALSE	FALSE	FALSE	FALSE	FALSE	No
No	40	Male	Saudi	O-	167	83	37	80	128	86	Negative	Negative	FALSE	FALSE	FALSE	FALSE	FALSE	FALSE	FALSE	FALSE	FALSE	No
No	30	Male	Saudi	A+	1635	63	36	68	120	68	Negative	Negative	FALSE	FALSE	FALSE	FALSE	FALSE	FALSE	FALSE	FALSE	FALSE	No
No	35	Male	Saudi	O+	180	80	37	90	119	69	Negative	Negative	FALSE	FALSE	FALSE	FALSE	FALSE	FALSE	FALSE	FALSE	FALSE	No
No	25	Female	Saudi	O-	150	60	36	91	110	75	Negative	Negative	FALSE	FALSE	FALSE	FALSE	FALSE	FALSE	FALSE	FALSE	FALSE	No
No	31	Female	Saudi	A-	170	56	36	89	102	61	Negative	Negative	FALSE	FALSE	FALSE	FALSE	FALSE	FALSE	FALSE	FALSE	FALSE	No
No	37	Female	Non-Saudi	A+	156	57	36	73	92	59	Negative	Negative	TRUE	TRUE	TRUE	FALSE	FALSE	FALSE	FALSE	FALSE	TRUE	Yes
No	32	Female	Non-Saudi	O+	149	57	37	84	121	84	Negative	Negative	FALSE	FALSE	FALSE	TRUE	FALSE	FALSE	FALSE	FALSE	TRUE	No
No	32	Male	Saudi	O+	180	74	36	75	141	80	Negative	Negative	FALSE	FALSE	FALSE	FALSE	FALSE	FALSE	FALSE	FALSE	FALSE	No
No	34	Male	Saudi	O+	165	62	37	111	135	84	Negative	Negative	FALSE	FALSE	FALSE	FALSE	FALSE	FALSE	FALSE	FALSE	TRUE	No
No	33	Male	Non-Saudi	AB+	182	71	36	83	104	70	Negative	Negative	FALSE	FALSE	FALSE	TRUE	FALSE	FALSE	FALSE	FALSE	FALSE	No
No	26	Female	Saudi	O-	152	58	36	74	99	64	Negative	Negative	FALSE	FALSE	FALSE	FALSE	FALSE	FALSE	FALSE	FALSE	TRUE	No
No	26	Female	Saudi	O+	156	56	36	93	110	60	Negative	Negative	TRUE	FALSE	FALSE	FALSE	FALSE	FALSE	FALSE	FALSE	TRUE	No
No	31	Female	Saudi	A+	159	59	37	83	128	86	Negative	Negative	FALSE	FALSE	FALSE	FALSE	FALSE	FALSE	FALSE	FALSE	FALSE	No
No	41	Male	Saudi	O+	182	57	36	80	124	71	Negative	Negative	FALSE	FALSE	FALSE	FALSE	FALSE	FALSE	FALSE	FALSE	FALSE	No
No	34	Female	Saudi	A+	160	64	37	85	113	77	Negative	Negative	FALSE	FALSE	FALSE	FALSE	FALSE	FALSE	FALSE	FALSE	FALSE	No
No	41	Male	Saudi	O+	172	140	36	84	132	67	Negative	Negative	FALSE	FALSE	FALSE	FALSE	FALSE	FALSE	FALSE	FALSE	FALSE	No
No	59	Male	Non-Saudi	B+	175	100	36	123	157	67	Negative	Negative	FALSE	FALSE	FALSE	TRUE	FALSE	TRUE	FALSE	FALSE	FALSE	No
No	35	Female	Saudi	O+	156	60	36	79	112	74	Negative	Negative	FALSE	FALSE	FALSE	FALSE	FALSE	FALSE	FALSE	FALSE	FALSE	No
No	42	Male	Saudi	A+	175	88	36	88	100	70	Negative	Negative	FALSE	FALSE	FALSE	FALSE	FALSE	FALSE	FALSE	FALSE	FALSE	No
No	42	Male	Saudi	A-	174	72	36	69	166	102	Negative	Negative	FALSE	FALSE	FALSE	FALSE	FALSE	FALSE	FALSE	FALSE	FALSE	No
No	38	Male	Saudi	AB+	175	81	36	100	130	84	Negative	Negative	FALSE	FALSE	FALSE	FALSE	FALSE	FALSE	FALSE	FALSE	FALSE	No
No	33	Male	Saudi	O+	183	86	36	70	133	69	Negative	Negative	FALSE	FALSE	FALSE	FALSE	FALSE	FALSE	FALSE	FALSE	FALSE	No
Yes	35	Female	Saudi	O-	175	94	37	89	134	88	Negative	Negative	FALSE	FALSE	FALSE	FALSE	FALSE	FALSE	FALSE	FALSE	FALSE	No
Yes	32	Female	Saudi	O+	167	74	36	87	102	68	Negative	Negative	FALSE	FALSE	FALSE	FALSE	FALSE	FALSE	FALSE	FALSE	FALSE	No
Yes	23	Female	Saudi	O+	158	52	37	87	112	68	Negative	Negative	FALSE	FALSE	FALSE	FALSE	FALSE	FALSE	FALSE	FALSE	FALSE	No
Yes	46	Female	Saudi	O-	163	77	36	85	117	73	Negative	Negative	FALSE	FALSE	FALSE	FALSE	FALSE	FALSE	FALSE	FALSE	FALSE	No
Yes	37	Female	Saudi	O+	155	78	36	82	102	68	Positive	Positive	TRUE	TRUE	TRUE	TRUE	FALSE	FALSE	FALSE	FALSE	TRUE	No
Yes	65	Female	Saudi	A+	160	113	37	85	123	77	Negative	Negative	FALSE	FALSE	FALSE	FALSE	FALSE	FALSE	FALSE	FALSE	FALSE	No
Yes	36	Female	Saudi	O-	157	62	37	89	112	70	Positive	Positive	FALSE	FALSE	TRUE	TRUE	FALSE	FALSE	FALSE	FALSE	TRUE	No
No	33	Male	Saudi	O-	179	82	37	86	119	72	Negative	Negative	FALSE	FALSE	FALSE	FALSE	FALSE	FALSE	FALSE	FALSE	FALSE	No
No	33	Male	Saudi	O-	153	65	37	89	128	86	Negative	Negative	FALSE	FALSE	FALSE	FALSE	FALSE	FALSE	FALSE	FALSE	FALSE	No
No	57	Male	Saudi	O+	169	68	37	84	138	92	Negative	Negative	FALSE	FALSE	FALSE	FALSE	FALSE	FALSE	FALSE	FALSE	FALSE	No
No	40	Female	Saudi	O-	158	82	36	87	118	80	Negative	Negative	FALSE	FALSE	FALSE	FALSE	FALSE	FALSE	FALSE	FALSE	TRUE	No
Yes	22	Female	Saudi	AB+	162	56	37	102	124	82	Negative	Negative	FALSE	FALSE	FALSE	FALSE	FALSE	FALSE	FALSE	FALSE	FALSE	No
No	48	Female	Saudi	B+	168	79	37	82	146	93	Negative	Negative	FALSE	FALSE	FALSE	FALSE	FALSE	FALSE	FALSE	FALSE	FALSE	No
No	38	Male	Saudi	B-	179	86	37	94	132	94	Negative	Negative	FALSE	FALSE	FALSE	FALSE	FALSE	FALSE	FALSE	FALSE	FALSE	No
No	39	Female	Saudi	O+	166	110	37	94	134	96	Negative	Negative	FALSE	FALSE	FALSE	FALSE	FALSE	FALSE	FALSE	FALSE	FALSE	No
Yes	41	Female	Saudi	A+	159	55	37	86	96	66	Negative	Negative	FALSE	FALSE	FALSE	FALSE	FALSE	FALSE	FALSE	FALSE	FALSE	No
Yes	50	Female	Saudi	A+	167	63	36	69	119	72	Negative	Negative	FALSE	FALSE	FALSE	FALSE	FALSE	FALSE	FALSE	FALSE	FALSE	No
Yes	21	Female	Saudi	B+	169	92	36	89	115	80	Negative	Negative	FALSE	FALSE	FALSE	FALSE	FALSE	FALSE	FALSE	TRUE	TRUE	No
Yes	30	Female	Saudi	O+	169	72	37	76	122	82	Negative	Negative	FALSE	FALSE	FALSE	FALSE	FALSE	FALSE	FALSE	FALSE	FALSE	No
No	45	Male	Saudi	O+	178	78	37	89	138	86	Negative	Negative	FALSE	FALSE	FALSE	FALSE	FALSE	FALSE	FALSE	FALSE	FALSE	No
No	39	Male	Saudi	AB+	182	80	37	92	138	89	Negative	Negative	FALSE	FALSE	FALSE	FALSE	FALSE	FALSE	FALSE	FALSE	FALSE	No
No	36	Male	Saudi	AB+	175	63	37	82	125	74	Negative	Negative	FALSE	FALSE	FALSE	FALSE	FALSE	FALSE	FALSE	FALSE	FALSE	No
No	37	Male	Saudi	O+	173	66	37	82	133	86	Negative	Positive	FALSE	FALSE	TRUE	TRUE	FALSE	FALSE	FALSE	FALSE	FALSE	No
Yes	35	Female	Saudi	O+	159	63	36	82	118	72	Negative	Negative	TRUE	FALSE	FALSE	TRUE	FALSE	FALSE	FALSE	FALSE	FALSE	No
No	30	Female	Saudi	B+	159	64	37	89	96	66	Negative	Negative	TRUE	FALSE	FALSE	TRUE	FALSE	FALSE	FALSE	FALSE	FALSE	No
No	46	Male	Saudi	A-	154	69	37	88	136	96	Positive	Positive	TRUE	FALSE	TRUE	TRUE	FALSE	FALSE	FALSE	FALSE	TRUE	No
No	31	Male	Non-Saudi	A-	156	52	37	76	125	73	Negative	Negative	FALSE	FALSE	FALSE	FALSE	FALSE	FALSE	FALSE	FALSE	FALSE	No
Yes	25	Female	Saudi	AB+	156	53	37	78	116	72	Negative	Negative	FALSE	FALSE	FALSE	FALSE	FALSE	FALSE	FALSE	FALSE	FALSE	No
No	36	Male	Saudi	AB+	172	69	37	88	133	91	Negative	Negative	FALSE	FALSE	FALSE	FALSE	FALSE	FALSE	FALSE	FALSE	FALSE	No
Yes	47	Female	Saudi	A+	163	73	37	90	128	82	Negative	Negative	FALSE	FALSE	FALSE	FALSE	FALSE	FALSE	FALSE	FALSE	FALSE	No
Yes	27	Female	Saudi	A+	153	52	37	78	118	71	Positive	Positive	FALSE	FALSE	FALSE	FALSE	FALSE	FALSE	FALSE	FALSE	TRUE	No
Yes	38	Female	Saudi	O-	162	63	37	78	132	86	Positive	Positive	FALSE	FALSE	FALSE	FALSE	FALSE	FALSE	FALSE	FALSE	TRUE	No
Yes	37	Male	Saudi	O+	175	82	36	89	136	89	Positive	Positive	TRUE	FALSE	TRUE	FALSE	FALSE	FALSE	FALSE	FALSE	FALSE	No
No	42	Male	Saudi	AB+	176	79	37	78	135	89	Negative	Negative	TRUE	FALSE	TRUE	TRUE	FALSE	FALSE	FALSE	FALSE	FALSE	No
Yes	42	Female	Saudi	A+	158	75	37	82	128	82	Positive	Positive	FALSE	FALSE	FALSE	FALSE	FALSE	FALSE	FALSE	FALSE	TRUE	No
No	35	Female	Non-Saudi	AB+	156	78	36	82	125	75	Negative	Negative	TRUE	FALSE	TRUE	TRUE	FALSE	FALSE	FALSE	FALSE	TRUE	No
No	53	Female	Non-Saudi	A+	148	52	37	86	112	68	Negative	Negative	FALSE	FALSE	FALSE	FALSE	FALSE	FALSE	FALSE	FALSE	FALSE	No
No	33	Female	Non-Saudi	A-	168	57	37	78	122	84	Negative	Negative	FALSE	FALSE	FALSE	FALSE	FALSE	FALSE	FALSE	FALSE	FALSE	No
No	26	Female	Saudi	O+	145	43	36	82	96	66	Negative	Negative	FALSE	FALSE	FALSE	FALSE	FALSE	FALSE	FALSE	FALSE	FALSE	No
No	39	Male	Saudi	AB+	182	83	36	94	138	86	Negative	Negative	FALSE	FALSE	FALSE	FALSE	FALSE	FALSE	FALSE	FALSE	FALSE	No
No	30	Male	Saudi	O+	187	98	37	80	146	94	Negative	Negative	FALSE	FALSE	FALSE	FALSE	TRUE	FALSE	FALSE	FALSE	FALSE	No
No	33	Female	Saudi	A+	166	68	37	64	100	69	Positive	Positive	FALSE	FALSE	FALSE	TRUE	FALSE	FALSE	FALSE	FALSE	TRUE	Yes
Yes	20	Female	Saudi	O+	162	53	37	69	117	65	Negative	Negative	FALSE	FALSE	FALSE	FALSE	FALSE	FALSE	FALSE	FALSE	FALSE	No
Yes	18	Female	Saudi	A+	161	53	36	80	129	86	Negative	Negative	FALSE	FALSE	FALSE	FALSE	FALSE	FALSE	FALSE	FALSE	TRUE	No
Yes	51	Female	Non-Saudi	O+	155	70	36	92	164	101	Negative	Negative	TRUE	TRUE	FALSE	TRUE	TRUE	FALSE	FALSE	FALSE	FALSE	No
No	20	Male	Saudi	O+	150	55	36	76	110	59	Negative	Negative	FALSE	FALSE	FALSE	FALSE	FALSE	FALSE	TRUE	FALSE	FALSE	No
Yes	35	Female	Saudi	O+	150	49	37	97	103	61	Negative	Negative	FALSE	FALSE	FALSE	FALSE	FALSE	FALSE	FALSE	FALSE	FALSE	No
Yes	35	Female	Saudi	O+	160	65	37	72	110	64	Negative	Negative	FALSE	FALSE	FALSE	TRUE	FALSE	FALSE	TRUE	FALSE	FALSE	No
Yes	50	Female	Saudi	O+	165	70	36	80	99	57	Negative	Negative	TRUE	FALSE	FALSE	TRUE	FALSE	FALSE	FALSE	FALSE	FALSE	No
Yes	34	Female	Saudi	O+	162	63	36	70	104	74	Negative	Negative	FALSE	FALSE	FALSE	FALSE	FALSE	FALSE	FALSE	TRUE	FALSE	No
Yes	35	Female	Saudi	A+	163	88	36	71	119	68	Negative	Negative	FALSE	FALSE	FALSE	FALSE	FALSE	FALSE	FALSE	FALSE	FALSE	No
No	42	Male	Saudi	A+	165	62	36	83	138	94	Negative	Negative	FALSE	FALSE	FALSE	FALSE	FALSE	FALSE	FALSE	FALSE	FALSE	No
No	55	Male	Saudi	B+	160	75	37	87	126	78	Positive	Positive	FALSE	FALSE	TRUE	TRUE	FALSE	FALSE	FALSE	TRUE	TRUE	Yes
No	29	Male	Saudi	B+	173	80	37	80	109	72	Negative	Negative	FALSE	FALSE	FALSE	FALSE	FALSE	FALSE	FALSE	FALSE	FALSE	No
No	29	Male	Saudi	A+	168	71	36	69	121	80	Positive	Positive	TRUE	FALSE	TRUE	TRUE	FALSE	FALSE	FALSE	FALSE	TRUE	Yes
No	35	Male	Saudi	B+	174	65	36	70	115	78	Negative	Negative	FALSE	FALSE	FALSE	FALSE	FALSE	FALSE	FALSE	FALSE	TRUE	No
No	30	Female	Saudi	A+	158	76	37	81	138	99	Negative	Negative	FALSE	FALSE	FALSE	FALSE	FALSE	FALSE	FALSE	FALSE	FALSE	No
No	28	Female	Saudi	A+	162	56	37	66	107	63	Negative	Negative	FALSE	FALSE	FALSE	FALSE	FALSE	FALSE	FALSE	FALSE	FALSE	No
Yes	34	Male	Saudi	O-	181	94	37	61	123	77	Negative	Negative	FALSE	FALSE	FALSE	FALSE	FALSE	FALSE	FALSE	FALSE	FALSE	No
No	48	Male	Saudi	O+	160	95	36	63	131	78	Negative	Negative	FALSE	FALSE	FALSE	FALSE	FALSE	FALSE	FALSE	FALSE	FALSE	No
No	47	Male	Saudi	AB+	172	90	38	79	182	91	Negative	Negative	FALSE	FALSE	FALSE	FALSE	FALSE	FALSE	FALSE	FALSE	FALSE	No
Yes	60	Male	Non-Saudi	A+	182	67	37	109	134	76	Negative	Negative	FALSE	FALSE	FALSE	FALSE	FALSE	FALSE	FALSE	FALSE	FALSE	No
No	23	Male	Saudi	O-	166	64	36	63	147	80	Negative	Negative	FALSE	FALSE	FALSE	FALSE	FALSE	FALSE	FALSE	FALSE	FALSE	No
No	35	Male	Saudi	B+	165	66	35	75	125	73	Negative	Negative	FALSE	FALSE	FALSE	FALSE	FALSE	FALSE	FALSE	FALSE	FALSE	No
No	27	Male	Saudi	O+	168	61	36	67	157	81	Negative	Negative	FALSE	FALSE	FALSE	FALSE	FALSE	FALSE	FALSE	FALSE	FALSE	No
No	34	Male	Saudi	A+	174	100	36	91	174	100	Negative	Negative	FALSE	FALSE	FALSE	FALSE	FALSE	FALSE	FALSE	FALSE	FALSE	No
No	35	Male	Saudi	O+	172	104	37	91	151	95	Negative	Negative	FALSE	FALSE	FALSE	FALSE	FALSE	FALSE	FALSE	FALSE	TRUE	No
No	54	Male	Saudi	O+	164	65	37	76	147	96	Negative	Negative	FALSE	FALSE	FALSE	FALSE	FALSE	FALSE	FALSE	FALSE	FALSE	No
No	30	Male	Saudi	B+	166	79	37	83	132	76	Negative	Negative	FALSE	FALSE	FALSE	FALSE	FALSE	FALSE	TRUE	FALSE	FALSE	No
No	36	Male	Saudi	O+	170	77	36	64	128	70	Negative	Negative	FALSE	FALSE	FALSE	FALSE	FALSE	FALSE	FALSE	FALSE	FALSE	No
No	34	Male	Saudi	B+	186	87	36	70	134	77	Negative	Negative	FALSE	FALSE	FALSE	FALSE	FALSE	FALSE	FALSE	FALSE	FALSE	No
No	23	Female	Saudi	O+	167	53	36	93	122	75	Negative	Negative	FALSE	FALSE	FALSE	FALSE	FALSE	FALSE	FALSE	FALSE	FALSE	No
No	28	Male	Saudi	O+	169	65	37	79	132	82	Negative	Negative	FALSE	FALSE	FALSE	FALSE	FALSE	FALSE	FALSE	FALSE	FALSE	No
No	41	Male	Saudi	O+	169	67	36	93	124	83	Negative	Negative	FALSE	FALSE	FALSE	FALSE	FALSE	FALSE	FALSE	FALSE	FALSE	No
No	36	Male	Saudi	A+	165	66	36	66	150	91	Negative	Negative	FALSE	FALSE	FALSE	FALSE	FALSE	FALSE	FALSE	FALSE	FALSE	No
No	34	Male	Saudi	O+	176	75	36	78	135	76	Negative	Negative	FALSE	FALSE	FALSE	FALSE	FALSE	FALSE	FALSE	FALSE	FALSE	No
No	32	Female	Saudi	O+	160	58	36	109	138	90	Negative	Negative	FALSE	FALSE	FALSE	FALSE	FALSE	FALSE	FALSE	FALSE	FALSE	No
No	30	Female	Saudi	O+	163	70	36	84	118	76	Negative	Negative	FALSE	FALSE	FALSE	FALSE	FALSE	FALSE	FALSE	FALSE	FALSE	No
No	47	Male	Saudi	O+	172	72	37	88	157	91	Negative	Negative	TRUE	FALSE	TRUE	TRUE	FALSE	FALSE	FALSE	FALSE	TRUE	Yes
No	31	Male	Saudi	B+	170	104	36	102	158	91	Positive	Positive	TRUE	FALSE	TRUE	TRUE	FALSE	TRUE	FALSE	FALSE	TRUE	Yes
No	36	Male	Saudi	O+	181	95	36	62	132	85	Positive	Positive	FALSE	TRUE	TRUE	TRUE	FALSE	FALSE	FALSE	TRUE	TRUE	Yes
No	36	Male	Saudi	O+	179	90	36	90	131	94	Negative	Negative	FALSE	FALSE	FALSE	FALSE	FALSE	FALSE	FALSE	FALSE	FALSE	No
No	38	Male	Saudi	O+	164	70	37	83	159	97	Negative	Negative	TRUE	FALSE	TRUE	TRUE	TRUE	FALSE	FALSE	TRUE	FALSE	Yes
No	40	Male	Saudi	B+	108	104	36	63	142	86	Positive	Positive	TRUE	TRUE	FALSE	TRUE	FALSE	FALSE	FALSE	FALSE	TRUE	Yes
No	63	Male	Non-Saudi	O+	160	70	36	76	176	89	Positive	Positive	FALSE	FALSE	FALSE	FALSE	FALSE	FALSE	FALSE	TRUE	TRUE	No
No	49	Male	Saudi	A+	171	80	36	98	166	104	Positive	Positive	FALSE	FALSE	FALSE	FALSE	FALSE	FALSE	FALSE	FALSE	TRUE	Yes
No	57	Male	Non-Saudi	A+	154	57	36	84	180	95	Positive	Positive	TRUE	FALSE	TRUE	TRUE	FALSE	FALSE	FALSE	FALSE	TRUE	Yes
No	35	Male	Saudi	O+	170	90	36	90	140	92	Negative	Negative	FALSE	FALSE	TRUE	TRUE	FALSE	FALSE	FALSE	FALSE	TRUE	Yes
No	35	Male	Saudi	B+	160	73	37	130	172	108	Negative	Negative	FALSE	FALSE	FALSE	FALSE	TRUE	FALSE	FALSE	FALSE	FALSE	No
No	32	Male	Saudi	A+	165	63	37	105	178	114	Negative	Negative	FALSE	FALSE	FALSE	FALSE	FALSE	FALSE	FALSE	FALSE	FALSE	No
No	34	Male	Saudi	O+	172	100	36	86	153	103	Negative	Negative	FALSE	FALSE	FALSE	FALSE	FALSE	TRUE	FALSE	FALSE	TRUE	No
No	35	Male	Saudi	O-	173	84	37	87	146	80	Negative	Negative	FALSE	FALSE	FALSE	FALSE	FALSE	FALSE	FALSE	FALSE	TRUE	No
No	40	Male	Saudi	O+	168	54	36	63	117	74	Negative	Negative	FALSE	FALSE	FALSE	FALSE	FALSE	FALSE	FALSE	FALSE	FALSE	No
No	40	Male	Saudi	A+	173	80	36	74	135	88	Negative	Negative	FALSE	FALSE	FALSE	FALSE	TRUE	FALSE	FALSE	TRUE	FALSE	No
No	54	Male	Non-Saudi	A+	160	74	36	86	148	100	Negative	Negative	FALSE	FALSE	FALSE	FALSE	FALSE	FALSE	FALSE	FALSE	FALSE	No
No	41	Male	Saudi	B+	178	82	36	87	155	88	Negative	Negative	FALSE	FALSE	FALSE	FALSE	TRUE	FALSE	FALSE	FALSE	FALSE	No
No	40	Male	Saudi	B+	165	75	36	69	118	67	Negative	Negative	FALSE	FALSE	FALSE	FALSE	TRUE	FALSE	FALSE	FALSE	FALSE	No
No	60	Male	Non-Saudi	A+	176	82	36	75	165	88	Negative	Negative	FALSE	FALSE	FALSE	FALSE	TRUE	FALSE	FALSE	FALSE	FALSE	No
No	41	Male	Saudi	O+	173	65	36	98	134	84	Negative	Negative	FALSE	FALSE	FALSE	FALSE	FALSE	FALSE	FALSE	FALSE	FALSE	No
No	54	Male	Non-Saudi	O+	156	65	36	84	167	94	Negative	Negative	FALSE	FALSE	FALSE	FALSE	FALSE	FALSE	FALSE	FALSE	TRUE	No
No	44	Male	Non-Saudi	B+	165	75	36	80	134	85	Negative	Negative	FALSE	FALSE	FALSE	FALSE	FALSE	FALSE	FALSE	FALSE	FALSE	No
No	40	Male	Non-Saudi	B+	155	173	36	77	169	117	Negative	Negative	FALSE	FALSE	FALSE	FALSE	FALSE	FALSE	FALSE	FALSE	FALSE	No
No	23	Male	Non-Saudi	O+	163	60	36	58	121	85	Negative	Negative	FALSE	FALSE	FALSE	FALSE	FALSE	FALSE	FALSE	FALSE	FALSE	No
No	37	Male	Saudi	O+	188	120	36	89	120	65	Negative	Negative	FALSE	FALSE	FALSE	FALSE	FALSE	FALSE	FALSE	FALSE	FALSE	No
No	41	Male	Saudi	B+	172	65	36	61	131	83	Negative	Negative	FALSE	FALSE	FALSE	FALSE	FALSE	FALSE	FALSE	FALSE	FALSE	No
No	47	Male	Saudi	A+	180	134	36	89	129	83	Negative	Negative	FALSE	FALSE	FALSE	FALSE	FALSE	FALSE	FALSE	FALSE	FALSE	No
No	33	Male	Saudi	A+	170	80	36	75	155	90	Negative	Negative	FALSE	FALSE	FALSE	FALSE	FALSE	FALSE	FALSE	FALSE	FALSE	No
No	28	Male	Saudi	O+	174	75	36	60	142	71	Negative	Negative	FALSE	FALSE	FALSE	FALSE	FALSE	FALSE	FALSE	FALSE	FALSE	No
No	34	Male	Saudi	O+	178	100	36	87	158	100	Negative	Negative	FALSE	FALSE	FALSE	FALSE	FALSE	TRUE	FALSE	FALSE	FALSE	No
No	37	Male	Saudi	AB+	162	79	36	75	125	74	Negative	Negative	FALSE	FALSE	FALSE	FALSE	FALSE	FALSE	FALSE	FALSE	TRUE	No
No	37	Male	Saudi	O+	168	66	37	75	126	72	Negative	Negative	FALSE	FALSE	FALSE	FALSE	FALSE	FALSE	FALSE	TRUE	TRUE	No
No	32	Male	Saudi	O+	182	92	36	64	127	96	Negative	Negative	FALSE	FALSE	FALSE	FALSE	FALSE	FALSE	FALSE	FALSE	FALSE	No
No	32	Male	Saudi	O+	176	77	37	75	121	85	Negative	Negative	TRUE	FALSE	FALSE	TRUE	TRUE	FALSE	FALSE	TRUE	FALSE	No
No	27	Male	Saudi	A+	170	60	36	79	131	73	Negative	Negative	FALSE	FALSE	FALSE	FALSE	FALSE	FALSE	FALSE	FALSE	TRUE	No
No	40	Male	Saudi	O+	170	65	37	76	159	107	Negative	Negative	FALSE	FALSE	FALSE	FALSE	FALSE	TRUE	FALSE	FALSE	FALSE	No
No	36	Male	Saudi	A+	165	76	36	60	111	62	Negative	Negative	FALSE	FALSE	FALSE	FALSE	FALSE	FALSE	FALSE	FALSE	FALSE	No
No	29	Male	Saudi	A+	181	70	36	77	109	54	Negative	Negative	FALSE	FALSE	FALSE	FALSE	FALSE	FALSE	FALSE	FALSE	FALSE	No
No	34	Male	Saudi	B+	174	95	37	60	155	98	Negative	Negative	FALSE	FALSE	FALSE	FALSE	FALSE	FALSE	FALSE	FALSE	FALSE	No
No	37	Male	Saudi	B+	170	80	37	61	124	87	Negative	Negative	FALSE	FALSE	FALSE	FALSE	FALSE	FALSE	FALSE	TRUE	FALSE	No
No	38	Male	Saudi	O+	171	92	37	66	124	80	Negative	Negative	FALSE	FALSE	FALSE	FALSE	FALSE	FALSE	FALSE	FALSE	TRUE	No
No	30	Male	Saudi	B-	177	113	36	86	135	94	Negative	Negative	FALSE	FALSE	FALSE	FALSE	FALSE	FALSE	FALSE	FALSE	TRUE	No
No	60	Male	Non-Saudi	AB+	153	73	36	77	152	88	Negative	Negative	FALSE	FALSE	FALSE	FALSE	TRUE	FALSE	FALSE	FALSE	FALSE	No
No	60	Male	Non-Saudi	AB+	165	85	36	74	165	101	Negative	Negative	FALSE	FALSE	FALSE	FALSE	FALSE	FALSE	FALSE	FALSE	FALSE	No
No	35	Male	Saudi	A+	175	70	37	56	157	88	Negative	Negative	FALSE	FALSE	FALSE	FALSE	FALSE	FALSE	FALSE	FALSE	FALSE	No
No	37	Male	Saudi	AB+	177	65	37	85	143	95	Negative	Negative	FALSE	FALSE	FALSE	FALSE	FALSE	FALSE	FALSE	FALSE	FALSE	No
No	30	Male	Saudi	O+	169	62	36	56	115	68	Negative	Negative	FALSE	FALSE	FALSE	FALSE	FALSE	FALSE	FALSE	FALSE	FALSE	No
No	30	Male	Saudi	A-	172	65	36	136	95	73	Negative	Negative	FALSE	FALSE	FALSE	FALSE	FALSE	FALSE	FALSE	FALSE	TRUE	No
No	31	Female	Saudi	B+	160	56	37	89	136	69	Negative	Negative	FALSE	FALSE	FALSE	FALSE	FALSE	FALSE	TRUE	FALSE	FALSE	No
No	35	Male	Saudi	B-	168	84	37	78	112	78	Negative	Negative	FALSE	FALSE	FALSE	FALSE	FALSE	FALSE	TRUE	FALSE	FALSE	No
No	37	Male	Saudi	O+	162	66	37	69	145	75	Negative	Negative	FALSE	FALSE	FALSE	FALSE	FALSE	FALSE	FALSE	FALSE	FALSE	No
No	32	Male	Saudi	O+	177	89	37	67	151	76	Negative	Negative	FALSE	FALSE	FALSE	FALSE	FALSE	FALSE	FALSE	FALSE	FALSE	No
No	33	Male	Saudi	O+	179	74	37	60	144	88	Negative	Negative	FALSE	FALSE	FALSE	FALSE	FALSE	FALSE	FALSE	FALSE	FALSE	No
No	48	Male	Saudi	O+	171	80	36	114	154	93	Negative	Negative	FALSE	FALSE	FALSE	FALSE	TRUE	FALSE	FALSE	FALSE	FALSE	No
No	54	Male	Saudi	B+	180	98	36	63	149	102	Negative	Negative	FALSE	FALSE	FALSE	FALSE	FALSE	FALSE	FALSE	FALSE	FALSE	No
No	41	Male	Saudi	O+	168	78	37	62	123	75	Negative	Negative	FALSE	FALSE	FALSE	FALSE	FALSE	FALSE	FALSE	FALSE	FALSE	No
No	38	Male	Saudi	O+	178	94	36	81	131	88	Negative	Negative	FALSE	FALSE	FALSE	FALSE	TRUE	FALSE	FALSE	FALSE	FALSE	No
No	35	Male	Saudi	AB+	168	88	37	84	148	87	Negative	Negative	FALSE	FALSE	FALSE	FALSE	FALSE	FALSE	FALSE	FALSE	FALSE	No
No	55	Male	Saudi	O+	170	75	36	78	174	94	Negative	Negative	FALSE	FALSE	FALSE	FALSE	FALSE	FALSE	FALSE	FALSE	FALSE	No
No	33	Male	Saudi	A+	182	80	37	62	1484	82	Negative	Negative	FALSE	FALSE	FALSE	FALSE	FALSE	FALSE	FALSE	FALSE	FALSE	No
No	37	Male	Saudi	O+	174	99	36	69	122	87	Negative	Negative	FALSE	FALSE	FALSE	FALSE	FALSE	FALSE	FALSE	FALSE	FALSE	No
No	45	Male	Saudi	B+	170	100	37	75	140	90	Negative	Negative	FALSE	FALSE	FALSE	FALSE	FALSE	FALSE	FALSE	FALSE	FALSE	No
No	29	Male	Saudi	B+	165	56	37	74	120	64	Negative	Negative	FALSE	FALSE	FALSE	FALSE	TRUE	FALSE	FALSE	FALSE	FALSE	No
No	32	Male	Saudi	O+	170	56	36	93	145	82	Negative	Negative	FALSE	FALSE	FALSE	FALSE	FALSE	FALSE	FALSE	FALSE	FALSE	No
No	53	Male	Saudi	A+	165	81	36	95	137	74	Negative	Negative	FALSE	FALSE	FALSE	FALSE	TRUE	FALSE	FALSE	FALSE	FALSE	No
No	52	Male	Saudi	B+	170	60	37	102	187	100	Negative	Negative	FALSE	FALSE	FALSE	FALSE	FALSE	FALSE	FALSE	FALSE	FALSE	No
No	41	Male	Non-Saudi	B+	167	81	37	90	159	100	Negative	Negative	FALSE	FALSE	FALSE	FALSE	FALSE	FALSE	FALSE	FALSE	FALSE	No
No	40	Male	Saudi	O+	165	75	36	61	115	74	Negative	Negative	FALSE	FALSE	FALSE	FALSE	FALSE	FALSE	FALSE	FALSE	FALSE	No
No	28	Male	Saudi	O+	172	70	37	135	179	102	Negative	Negative	FALSE	FALSE	FALSE	FALSE	FALSE	FALSE	FALSE	FALSE	FALSE	No
No	37	Male	Saudi	A+	165	84	36	65	137	82	Negative	Negative	FALSE	FALSE	FALSE	FALSE	FALSE	FALSE	FALSE	FALSE	FALSE	No
No	33	Male	Saudi	AB+	188	75	37	120	156	134	Negative	Negative	FALSE	FALSE	FALSE	FALSE	FALSE	FALSE	FALSE	FALSE	FALSE	No
No	26	Male	Saudi	O-	170	42	37	90	117	70	Negative	Negative	FALSE	FALSE	FALSE	FALSE	FALSE	FALSE	FALSE	FALSE	FALSE	No
No	35	Male	Saudi	O+	161	50	37	60	126	72	Negative	Negative	FALSE	FALSE	FALSE	FALSE	FALSE	FALSE	FALSE	FALSE	FALSE	No
No	31	Male	Saudi	B+	189	85	37	72	159	103	Negative	Negative	FALSE	FALSE	FALSE	FALSE	FALSE	FALSE	FALSE	FALSE	FALSE	No
No	32	Male	Saudi	O+	176	74	36	70	129	84	Negative	Negative	FALSE	FALSE	FALSE	FALSE	FALSE	FALSE	FALSE	FALSE	FALSE	No
No	24	Male	Saudi	B+	170	65	37	61	126	81	Negative	Negative	FALSE	FALSE	FALSE	FALSE	FALSE	FALSE	FALSE	FALSE	FALSE	No
No	37	Female	Saudi	O-	154	72	36	81	112	76	Negative	Negative	FALSE	FALSE	FALSE	FALSE	FALSE	FALSE	FALSE	FALSE	FALSE	No
No	47	Male	Saudi	O+	176	110	36	66	146	100	Negative	Negative	FALSE	FALSE	FALSE	FALSE	FALSE	TRUE	FALSE	FALSE	FALSE	No
No	38	Male	Saudi	B+	177	71	36	73	146	95	Negative	Negative	TRUE	FALSE	FALSE	FALSE	FALSE	FALSE	FALSE	FALSE	TRUE	No
No	31	Male	Saudi	A+	166	65	36	70	134	89	Negative	Negative	FALSE	FALSE	FALSE	FALSE	FALSE	FALSE	FALSE	TRUE	FALSE	No
No	35	Male	Saudi	B+	170	82	36	68	136	79	Negative	Negative	FALSE	FALSE	FALSE	FALSE	FALSE	FALSE	FALSE	FALSE	TRUE	No
No	30	Male	Saudi	O+	180	86	36	74	141	95	Negative	Negative	FALSE	FALSE	FALSE	FALSE	FALSE	FALSE	FALSE	TRUE	FALSE	No
No	36	Male	Saudi	O+	184	140	36	95	107	90	Negative	Negative	FALSE	FALSE	FALSE	FALSE	TRUE	TRUE	FALSE	FALSE	FALSE	No
No	32	Male	Saudi	B+	170	54	36	75	120	80	Negative	Negative	FALSE	FALSE	FALSE	FALSE	FALSE	FALSE	FALSE	FALSE	FALSE	No
No	43	Male	Saudi	O+	170	94	37	63	126	75	Negative	Negative	FALSE	FALSE	FALSE	FALSE	FALSE	FALSE	FALSE	FALSE	TRUE	No
No	35	Male	Saudi	A+	172	74	36	75	156	80	Negative	Negative	FALSE	FALSE	FALSE	FALSE	FALSE	FALSE	FALSE	FALSE	FALSE	No
No	50	Male	Saudi	O+	167	65	36	67	161	100	Negative	Negative	FALSE	FALSE	FALSE	FALSE	FALSE	FALSE	FALSE	FALSE	FALSE	No
No	30	Male	Saudi	A+	160	75	37	83	159	90	Negative	Negative	FALSE	FALSE	FALSE	FALSE	FALSE	FALSE	FALSE	FALSE	FALSE	No
No	27	Male	Saudi	A+	177	83	37	65	137	66	Negative	Negative	FALSE	FALSE	FALSE	FALSE	FALSE	FALSE	FALSE	FALSE	FALSE	No
No	38	Male	Saudi	O+	169	80	36	101	128	82	Negative	Negative	FALSE	FALSE	FALSE	FALSE	TRUE	FALSE	FALSE	FALSE	FALSE	No
No	38	Male	Saudi	O+	170	76	36	75	131	89	Negative	Negative	FALSE	FALSE	FALSE	FALSE	FALSE	FALSE	FALSE	FALSE	FALSE	No
No	34	Female	Saudi	A+	153	71	36	84	137	85	Negative	Negative	FALSE	FALSE	FALSE	TRUE	FALSE	FALSE	FALSE	FALSE	FALSE	No
No	49	Male	Saudi	B+	167	70	36	70	160	99	Negative	Negative	FALSE	FALSE	FALSE	FALSE	FALSE	FALSE	FALSE	FALSE	FALSE	No
No	44	Male	Saudi	B+	162	60	36	70	133	84	Negative	Negative	FALSE	FALSE	FALSE	FALSE	TRUE	FALSE	FALSE	FALSE	FALSE	No
No	34	Female	Saudi	B+	167	81	36	113	127	89	Negative	Negative	FALSE	FALSE	FALSE	FALSE	FALSE	FALSE	FALSE	FALSE	TRUE	No
No	29	Male	Saudi	B-	186	97	36	111	120	88	Negative	Negative	FALSE	TRUE	FALSE	FALSE	FALSE	FALSE	FALSE	FALSE	FALSE	No
No	28	Female	Saudi	O+	154	46	36	85	124	68	Negative	Negative	FALSE	FALSE	FALSE	FALSE	FALSE	FALSE	FALSE	FALSE	FALSE	No
No	27	Female	Saudi	B+	162	58	36	78	144	121	Negative	Negative	FALSE	FALSE	FALSE	FALSE	TRUE	FALSE	FALSE	FALSE	FALSE	No
No	27	Female	Saudi	B+	165	64	36	81	126	84	Negative	Negative	FALSE	FALSE	FALSE	FALSE	FALSE	FALSE	FALSE	FALSE	FALSE	No
No	34	Male	Saudi	O+	170	92	36	65	153	82	Negative	Negative	FALSE	FALSE	FALSE	FALSE	FALSE	FALSE	FALSE	FALSE	FALSE	No
No	33	Male	Non-Saudi	A+	167	65	36	70	159	91	Positive	Positive	FALSE	FALSE	FALSE	FALSE	FALSE	FALSE	FALSE	FALSE	FALSE	No
No	45	Male	Saudi	O+	175	95	36	68	150	80	Negative	Negative	FALSE	FALSE	FALSE	FALSE	FALSE	TRUE	FALSE	FALSE	FALSE	No
No	33	Male	Saudi	B+	167	98	36	62	132	83	Negative	Negative	FALSE	FALSE	FALSE	FALSE	TRUE	TRUE	FALSE	FALSE	FALSE	No
No	37	Male	Saudi	A+	180	90	36	90	131	92	Negative	Negative	FALSE	FALSE	FALSE	FALSE	FALSE	FALSE	FALSE	FALSE	FALSE	No
No	30	Male	Saudi	O+	172	100	36	90	136	76	Negative	Negative	FALSE	FALSE	FALSE	FALSE	FALSE	FALSE	FALSE	TRUE	FALSE	No
No	24	Female	Saudi	B+	163	57	36	81	130	90	Negative	Negative	FALSE	FALSE	FALSE	FALSE	FALSE	FALSE	FALSE	FALSE	FALSE	No
No	48	Male	Saudi	B+	177	100	36	80	135	90	Negative	Negative	FALSE	FALSE	FALSE	FALSE	FALSE	FALSE	FALSE	FALSE	FALSE	No
No	36	Male	Saudi	O+	167	75	36	75	145	95	Negative	Negative	FALSE	FALSE	FALSE	FALSE	FALSE	FALSE	FALSE	FALSE	FALSE	No
No	35	Male	Saudi	O+	170	82	36	68	119	83	Negative	Negative	FALSE	FALSE	FALSE	FALSE	FALSE	FALSE	FALSE	FALSE	FALSE	No
No	42	Male	Saudi	A+	170	84	36	75	158	95	Negative	Negative	FALSE	FALSE	FALSE	FALSE	FALSE	FALSE	FALSE	FALSE	FALSE	No
No	42	Male	Saudi	A+	169	58	36	56	134	71	Negative	Negative	FALSE	FALSE	FALSE	FALSE	FALSE	FALSE	FALSE	FALSE	FALSE	No
No	34	Male	Saudi	B+	165	65	36	72	128	79	Negative	Negative	FALSE	FALSE	FALSE	FALSE	FALSE	FALSE	FALSE	FALSE	FALSE	No
No	32	Male	Saudi	A+	174	59	36	81	130	85	Negative	Negative	FALSE	FALSE	FALSE	FALSE	FALSE	FALSE	FALSE	FALSE	FALSE	No
No	35	Male	Saudi	B+	173	120	37	90	140	81	Negative	Negative	FALSE	FALSE	FALSE	FALSE	FALSE	FALSE	FALSE	FALSE	FALSE	No
No	33	Male	Non-Saudi	B+	189	90	37	73	140	89	Negative	Negative	FALSE	FALSE	FALSE	FALSE	FALSE	FALSE	FALSE	FALSE	FALSE	No
No	43	Male	Saudi	O+	170	77	36	123	80	68	Negative	Negative	FALSE	FALSE	FALSE	FALSE	FALSE	FALSE	FALSE	FALSE	FALSE	No
No	26	Male	Saudi	O+	177	61	37	72	123	76	Negative	Negative	FALSE	FALSE	FALSE	FALSE	FALSE	FALSE	FALSE	FALSE	FALSE	No
No	30	Male	Saudi	A+	175	125	36	80	133	84	Negative	Negative	FALSE	FALSE	FALSE	FALSE	FALSE	TRUE	FALSE	FALSE	FALSE	No
No	40	Male	Saudi	O+	173	69	36	80	121	75	Negative	Negative	FALSE	FALSE	FALSE	FALSE	FALSE	FALSE	FALSE	FALSE	FALSE	No
No	39	Male	Saudi	A+	170	68	36	68	117	79	Negative	Negative	FALSE	FALSE	FALSE	FALSE	FALSE	FALSE	FALSE	FALSE	FALSE	No
No	44	Male	Non-Saudi	A+	182	109	36	70	130	70	Negative	Negative	FALSE	FALSE	FALSE	FALSE	FALSE	FALSE	FALSE	FALSE	FALSE	No
No	46	Male	Non-Saudi	A+	160	70	37	70	130	70	Negative	Negative	FALSE	FALSE	FALSE	FALSE	FALSE	FALSE	TRUE	FALSE	FALSE	No
No	25	Female	Saudi	O+	152	53	37	70	119	70	Negative	Negative	FALSE	FALSE	FALSE	FALSE	FALSE	FALSE	FALSE	FALSE	FALSE	No
No	36	Female	Saudi	O+	181	110	36	75	115	78	Negative	Negative	FALSE	FALSE	FALSE	FALSE	FALSE	FALSE	FALSE	FALSE	FALSE	No
No	50	Male	Saudi	AB+	150	70	36	79	147	94	Negative	Negative	FALSE	FALSE	FALSE	FALSE	FALSE	FALSE	FALSE	FALSE	FALSE	No
No	33	Male	Saudi	B+	163	68	36	87	138	102	Negative	Negative	FALSE	FALSE	FALSE	FALSE	FALSE	FALSE	FALSE	FALSE	FALSE	No
No	52	Male	Saudi	A+	158	84	36	75	140	95	Negative	Negative	FALSE	FALSE	FALSE	FALSE	TRUE	TRUE	TRUE	FALSE	FALSE	No
No	56	Male	Saudi	O+	180	77	36	96	164	79	Negative	Negative	FALSE	FALSE	FALSE	FALSE	TRUE	FALSE	TRUE	TRUE	FALSE	No
No	39	Male	Saudi	B+	178	82	36	71	137	80	Negative	Negative	FALSE	FALSE	FALSE	FALSE	FALSE	FALSE	FALSE	FALSE	FALSE	No
No	45	Male	Saudi	B+	163	60	36	68	126	78	Negative	Negative	FALSE	FALSE	FALSE	FALSE	FALSE	FALSE	FALSE	FALSE	FALSE	No
No	35	Male	Saudi	A+	180	90	36	86	129	79	Negative	Negative	FALSE	FALSE	FALSE	FALSE	FALSE	FALSE	FALSE	FALSE	FALSE	No
No	36	Male	Saudi	O+	175	72	36	71	131	80	Negative	Negative	FALSE	FALSE	FALSE	FALSE	FALSE	FALSE	FALSE	TRUE	TRUE	No
No	37	Female	Saudi	O+	164	67	36	109	131	111	Negative	Negative	FALSE	FALSE	FALSE	FALSE	FALSE	FALSE	FALSE	FALSE	FALSE	No
No	36	Male	Saudi	A+	168	62	36	78	132	82	Negative	Negative	TRUE	FALSE	TRUE	FALSE	FALSE	FALSE	FALSE	FALSE	FALSE	Yes
No	37	Male	Saudi	A+	169	72	37	89	139	92	Negative	Positive	TRUE	FALSE	TRUE	TRUE	FALSE	FALSE	FALSE	FALSE	FALSE	No
No	36	Female	Saudi	A+	158	68	37	111	152	88	Negative	Negative	FALSE	FALSE	FALSE	FALSE	FALSE	FALSE	FALSE	FALSE	FALSE	No
No	34	Female	Saudi	A+	165	57	37	97	123	79	Negative	Negative	FALSE	FALSE	FALSE	FALSE	FALSE	FALSE	FALSE	FALSE	FALSE	No
Yes	36	Female	Saudi	O+	157	86	36	96	123	84	Positive	Positive	TRUE	TRUE	TRUE	TRUE	FALSE	FALSE	FALSE	FALSE	TRUE	No
No	44	Male	Saudi	O+	169	78	36	99	144	94	Negative	Negative	FALSE	FALSE	FALSE	FALSE	FALSE	FALSE	FALSE	FALSE	FALSE	No
No	28	Male	Saudi	O-	172	72	36	89	125	75	Negative	Negative	FALSE	FALSE	FALSE	FALSE	FALSE	FALSE	FALSE	FALSE	FALSE	No
No	32	Female	Saudi	O+	153	53	37	82	123	73	Negative	Negative	FALSE	FALSE	FALSE	FALSE	FALSE	FALSE	FALSE	FALSE	FALSE	No
No	28	Female	Non-Saudi	O+	152	50	37	76	102	68	Negative	Positive	FALSE	FALSE	FALSE	FALSE	FALSE	FALSE	FALSE	FALSE	TRUE	No
No	52	Female	Non-Saudi	O+	153	53	37	69	145	82	Negative	Positive	FALSE	FALSE	FALSE	FALSE	FALSE	FALSE	FALSE	FALSE	TRUE	No
No	42	Female	Non-Saudi	O+	146	56	37	82	139	82	Negative	Negative	FALSE	FALSE	FALSE	FALSE	FALSE	FALSE	FALSE	FALSE	TRUE	No
Yes	41	Female	Saudi	AB+	169	79	37	89	128	79	Negative	Negative	FALSE	FALSE	FALSE	FALSE	FALSE	FALSE	FALSE	FALSE	FALSE	No
Yes	32	Female	Non-Saudi	AB+	156	55	37	84	134	86	Negative	Negative	FALSE	FALSE	FALSE	FALSE	FALSE	FALSE	FALSE	FALSE	FALSE	No
No	27	Female	Non-Saudi	O+	159	59	37	77	118	74	Negative	Negative	FALSE	FALSE	FALSE	FALSE	FALSE	FALSE	FALSE	FALSE	TRUE	No
No	45	Female	Non-Saudi	O+	144	59	37	79	123	76	Negative	Positive	FALSE	FALSE	FALSE	FALSE	FALSE	FALSE	FALSE	FALSE	TRUE	No
No	29	Female	Saudi	A+	162	55	37	103	100	69	Negative	Negative	TRUE	FALSE	FALSE	TRUE	FALSE	FALSE	FALSE	FALSE	FALSE	No
No	40	Female	Non-Saudi	B+	154	89	37	98	145	95	Positive	Negative	TRUE	TRUE	TRUE	TRUE	TRUE	FALSE	FALSE	FALSE	TRUE	No
No	54	Male	Saudi	O+	169	89	36	89	149	96	Negative	Negative	FALSE	FALSE	FALSE	FALSE	FALSE	FALSE	FALSE	FALSE	FALSE	No
Yes	45	Female	Saudi	O+	159	89	37	82	138	84	Negative	Positive	FALSE	FALSE	FALSE	FALSE	FALSE	FALSE	FALSE	FALSE	TRUE	No
No	30	Male	Saudi	O-	172	68	37	87	123	73	Negative	Negative	FALSE	FALSE	FALSE	FALSE	FALSE	FALSE	FALSE	FALSE	FALSE	No
No	37	Female	Saudi	O+	157	59	36	74	105	67	Positive	Positive	TRUE	TRUE	TRUE	TRUE	FALSE	FALSE	FALSE	FALSE	TRUE	Yes
Yes	60	Female	Non-Saudi	O+	155	69	37	74	148	84	Negative	Negative	FALSE	FALSE	FALSE	FALSE	TRUE	FALSE	FALSE	FALSE	FALSE	No
No	32	Male	Saudi	AB+	185	82	36	89	128	82	Negative	Negative	FALSE	FALSE	FALSE	FALSE	FALSE	FALSE	FALSE	FALSE	FALSE	No
No	38	Male	Saudi	O-	169	73	36	82	118	82	Negative	Negative	FALSE	FALSE	FALSE	FALSE	FALSE	FALSE	FALSE	FALSE	FALSE	No
No	30	Male	Saudi	O+	184	72	36	99	132	82	Negative	Negative	FALSE	FALSE	FALSE	FALSE	FALSE	FALSE	FALSE	FALSE	FALSE	No
No	45	Male	Saudi	O-	183	89	36	89	138	89	Positive	Positive	TRUE	TRUE	TRUE	TRUE	FALSE	FALSE	FALSE	FALSE	TRUE	Yes
No	35	Male	Saudi	O+	174	76	36	78	126	82	Negative	Negative	FALSE	FALSE	FALSE	FALSE	FALSE	FALSE	FALSE	FALSE	FALSE	No
No	32	Male	Saudi	AB+	163	59	36	96	112	76	Negative	Negative	FALSE	FALSE	FALSE	FALSE	FALSE	FALSE	FALSE	FALSE	FALSE	No
No	26	Female	Saudi	A+	162	53	37	89	118	75	Negative	Negative	FALSE	FALSE	FALSE	FALSE	FALSE	FALSE	FALSE	FALSE	FALSE	No
No	33	Female	Saudi	B+	168	95	37	89	136	92	Positive	Positive	TRUE	FALSE	TRUE	TRUE	FALSE	FALSE	FALSE	FALSE	TRUE	No
No	37	Female	Non-Saudi	O+	154	53	37	78	1132	83	Negative	Negative	FALSE	FALSE	FALSE	FALSE	FALSE	FALSE	FALSE	FALSE	FALSE	No
No	26	Female	Non-Saudi	B+	152	59	37	72	110	72	Negative	Negative	FALSE	FALSE	FALSE	FALSE	FALSE	FALSE	FALSE	FALSE	FALSE	No
No	27	Female	Saudi	A+	168	87	36	89	128	78	Negative	Negative	FALSE	FALSE	FALSE	FALSE	FALSE	FALSE	FALSE	FALSE	FALSE	No
No	29	Female	Saudi	O+	159	57	36	79	118	79	Negative	Negative	FALSE	FALSE	FALSE	FALSE	FALSE	FALSE	FALSE	FALSE	FALSE	No
Yes	27	Female	Non-Saudi	O+	146	56	37	89	116	68	Negative	Negative	TRUE	FALSE	TRUE	TRUE	FALSE	FALSE	FALSE	FALSE	FALSE	No
Yes	48	Female	Saudi	O+	159	76	36	89	118	79	Positive	Positive	FALSE	FALSE	FALSE	FALSE	FALSE	FALSE	FALSE	FALSE	TRUE	No
Yes	50	Female	Saudi	O-	157	93	36	89	142	94	Negative	Positive	FALSE	FALSE	FALSE	FALSE	TRUE	FALSE	FALSE	FALSE	TRUE	No
Yes	52	Female	Non-Saudi	A+	159	52	36	82	142	89	Negative	Negative	FALSE	FALSE	FALSE	FALSE	FALSE	FALSE	FALSE	FALSE	FALSE	No
No	34	Male	Saudi	AB+	175	76	36	82	142	82	Negative	Negative	FALSE	FALSE	FALSE	FALSE	FALSE	FALSE	FALSE	FALSE	FALSE	No
No	38	Male	Saudi	AB+	176	86	36	88	135	79	Negative	Negative	FALSE	FALSE	FALSE	FALSE	FALSE	FALSE	FALSE	FALSE	FALSE	No
No	20	Male	Saudi	O+	168	56	36	82	123	73	Negative	Negative	FALSE	FALSE	FALSE	FALSE	FALSE	FALSE	FALSE	FALSE	FALSE	No
No	23	Female	Saudi	O+	158	56	37	86	118	86	Negative	Negative	FALSE	FALSE	FALSE	FALSE	FALSE	FALSE	FALSE	FALSE	FALSE	No
Yes	43	Male	Non-Saudi	O-	172	89	36	74	136	86	Negative	Negative	TRUE	FALSE	TRUE	TRUE	FALSE	FALSE	FALSE	FALSE	FALSE	Yes
No	40	Male	Saudi	O-	163	63	36	89	146	86	Positive	Positive	FALSE	FALSE	TRUE	FALSE	FALSE	FALSE	FALSE	FALSE	TRUE	Yes
Yes	41	Female	Saudi	AB+	156	56	36	72	110	74	Negative	Negative	FALSE	FALSE	FALSE	FALSE	FALSE	FALSE	FALSE	FALSE	FALSE	No
Yes	44	Female	Saudi	AB+	159	69	36	96	139	86	Negative	Negative	FALSE	FALSE	FALSE	FALSE	FALSE	FALSE	FALSE	FALSE	FALSE	No
No	38	Female	Saudi	O+	155	79	36	89	123	82	Negative	Negative	FALSE	FALSE	FALSE	FALSE	FALSE	FALSE	FALSE	FALSE	FALSE	No
No	33	Female	Saudi	B-	159	55	36	92	123	73	Negative	Negative	FALSE	FALSE	FALSE	FALSE	FALSE	FALSE	FALSE	FALSE	FALSE	No
No	34	Female	Saudi	A+	168	92	37	93	129	79	Negative	Negative	FALSE	FALSE	FALSE	FALSE	FALSE	FALSE	FALSE	FALSE	TRUE	No
No	47	Female	Non-Saudi	B+	156	53	37	82	142	82	Negative	Negative	FALSE	FALSE	FALSE	FALSE	TRUE	FALSE	FALSE	FALSE	TRUE	No
No	28	Female	Saudi	A-	168	54	36	107	130	80	Negative	Negative	FALSE	FALSE	FALSE	FALSE	FALSE	FALSE	FALSE	FALSE	FALSE	No
No	49	Male	Saudi	B+	182	100	37	71	133	76	Negative	Negative	FALSE	FALSE	FALSE	FALSE	FALSE	FALSE	FALSE	FALSE	TRUE	No
No	57	Male	Saudi	A+	168	74	36	62	130	94	Negative	Negative	FALSE	FALSE	FALSE	FALSE	FALSE	FALSE	FALSE	FALSE	FALSE	No
No	32	Male	Saudi	O+	170	78	36	68	112	74	Negative	Negative	FALSE	FALSE	FALSE	FALSE	FALSE	FALSE	FALSE	FALSE	FALSE	No
No	53	Male	Saudi	AB+	187	86	36	91	112	71	Negative	Negative	FALSE	FALSE	FALSE	FALSE	FALSE	FALSE	FALSE	FALSE	FALSE	No
No	30	Male	Saudi	B+	179	90	37	77	152	93	Negative	Negative	FALSE	FALSE	FALSE	FALSE	FALSE	FALSE	FALSE	FALSE	FALSE	No
No	33	Female	Saudi	B+	173	80	37	100	124	78	Negative	Negative	FALSE	FALSE	FALSE	FALSE	FALSE	FALSE	FALSE	FALSE	TRUE	No
No	47	Male	Non-Saudi	B+	177	65	37	66	150	87	Positive	Positive	FALSE	FALSE	FALSE	FALSE	FALSE	FALSE	TRUE	FALSE	FALSE	No
No	58	Male	Saudi	O+	161	75	36	65	157	98	Negative	Negative	TRUE	FALSE	FALSE	FALSE	FALSE	FALSE	TRUE	FALSE	FALSE	No
No	39	Male	Saudi	O+	175	90	37	90	128	100	Negative	Negative	FALSE	FALSE	FALSE	FALSE	FALSE	FALSE	FALSE	FALSE	FALSE	No
No	39	Female	Saudi	O+	154	55	37	78	97	59	Negative	Negative	FALSE	FALSE	FALSE	FALSE	FALSE	FALSE	FALSE	FALSE	FALSE	No
No	54	Male	Saudi	A+	189	83	36	93	152	91	Negative	Negative	FALSE	FALSE	FALSE	FALSE	TRUE	FALSE	FALSE	FALSE	FALSE	No
No	44	Male	Saudi	O-	170	100	36	79	133	70	Negative	Negative	FALSE	FALSE	FALSE	FALSE	FALSE	FALSE	FALSE	FALSE	FALSE	No
No	38	Male	Saudi	AB+	176	93	36	65	124	73	Negative	Negative	FALSE	FALSE	FALSE	FALSE	FALSE	FALSE	FALSE	FALSE	TRUE	No
No	42	Male	Saudi	B+	174	74	37	62	148	90	Negative	Negative	FALSE	FALSE	FALSE	FALSE	FALSE	FALSE	FALSE	FALSE	FALSE	No
No	31	Male	Saudi	A+	163	69	36	63	144	85	Negative	Negative	FALSE	FALSE	FALSE	FALSE	FALSE	FALSE	FALSE	FALSE	FALSE	No
No	55	Male	Saudi	B+	162	68	36	90	145	84	Negative	Negative	TRUE	FALSE	FALSE	FALSE	FALSE	FALSE	FALSE	FALSE	FALSE	No
No	40	Male	Saudi	A-	169	78	37	112	142	81	Negative	Negative	FALSE	FALSE	FALSE	FALSE	FALSE	FALSE	FALSE	FALSE	FALSE	No
No	29	Male	Saudi	B+	173	70	36	68	152	90	Negative	Negative	FALSE	FALSE	FALSE	FALSE	FALSE	FALSE	FALSE	FALSE	TRUE	No
No	37	Male	Saudi	O+	170	100	36	82	147	92	Negative	Negative	FALSE	FALSE	FALSE	FALSE	TRUE	TRUE	FALSE	FALSE	FALSE	No
No	47	Male	Saudi	B+	174	98	36	81	116	86	Negative	Negative	FALSE	FALSE	FALSE	FALSE	FALSE	FALSE	FALSE	FALSE	FALSE	No
No	43	Male	Saudi	O+	174	88	36	61	122	78	Negative	Negative	FALSE	FALSE	FALSE	FALSE	FALSE	FALSE	FALSE	FALSE	FALSE	No
No	37	Male	Saudi	O+	167	75	36	85	130	77	Negative	Negative	FALSE	FALSE	FALSE	FALSE	FALSE	FALSE	FALSE	FALSE	TRUE	No
No	30	Male	Saudi	A+	173	114	37	60	118	80	Negative	Negative	FALSE	FALSE	FALSE	FALSE	FALSE	TRUE	FALSE	TRUE	FALSE	No
No	34	Male	Saudi	O+	175	87	36	98	152	98	Negative	Negative	FALSE	FALSE	FALSE	FALSE	FALSE	FALSE	FALSE	FALSE	FALSE	No
No	82	Male	Saudi	O+	180	84	37	65	180	99	Negative	Negative	FALSE	FALSE	FALSE	FALSE	TRUE	FALSE	TRUE	FALSE	FALSE	No
No	35	Male	Saudi	A+	172	80	37	67	116	70	Negative	Negative	FALSE	FALSE	FALSE	FALSE	FALSE	FALSE	FALSE	FALSE	TRUE	No
No	23	Male	Saudi	A+	170	100	36	79	136	72	Negative	Negative	FALSE	FALSE	FALSE	TRUE	FALSE	TRUE	FALSE	FALSE	FALSE	No
No	70	Male	Saudi	B+	172	76	37	81	155	83	Positive	Positive	FALSE	TRUE	TRUE	TRUE	FALSE	FALSE	FALSE	TRUE	TRUE	Yes
No	30	Male	Saudi	O+	165	100	37	84	176	86	Positive	Positive	TRUE	TRUE	TRUE	TRUE	FALSE	TRUE	FALSE	FALSE	TRUE	Yes
No	24	Male	Saudi	A+	170	62	37	66	143	83	Positive	Positive	TRUE	FALSE	TRUE	TRUE	FALSE	FALSE	FALSE	FALSE	FALSE	Yes
No	36	Male	Saudi	O+	164	76	37	74	124	82	Negative	Negative	FALSE	FALSE	FALSE	FALSE	FALSE	FALSE	FALSE	FALSE	TRUE	No
No	59	Male	Saudi	A+	176	94	37	68	100	67	Negative	Negative	FALSE	FALSE	FALSE	FALSE	FALSE	TRUE	FALSE	FALSE	FALSE	No
No	36	Male	Saudi	O+	175	115	37	74	139	86	Negative	Negative	FALSE	FALSE	FALSE	FALSE	FALSE	TRUE	FALSE	FALSE	FALSE	No
No	39	Male	Saudi	O+	160	85	36	91	138	88	Negative	Negative	FALSE	FALSE	FALSE	FALSE	FALSE	FALSE	FALSE	FALSE	FALSE	No
No	22	Male	Non-Saudi	AB+	170	70	37	70	139	82	Negative	Negative	FALSE	FALSE	FALSE	FALSE	FALSE	FALSE	FALSE	FALSE	FALSE	No
No	47	Male	Saudi	A+	176	90	37	81	121	71	Negative	Negative	TRUE	FALSE	FALSE	FALSE	TRUE	TRUE	TRUE	FALSE	FALSE	No
No	55	Female	Saudi	O+	172	80	37	65	161	89	Positive	Positive	TRUE	FALSE	FALSE	TRUE	FALSE	FALSE	FALSE	FALSE	TRUE	Yes
No	36	Male	Non-Saudi	B+	155	75	37	67	138	103	Positive	Positive	FALSE	FALSE	FALSE	FALSE	FALSE	FALSE	FALSE	FALSE	FALSE	No
No	35	Male	Saudi	A+	165	75	36	55	159	67	Negative	Negative	FALSE	FALSE	FALSE	FALSE	FALSE	FALSE	FALSE	FALSE	TRUE	No
No	42	Male	Saudi	O+	170	80	36	81	129	84	Negative	Negative	FALSE	FALSE	FALSE	FALSE	FALSE	FALSE	FALSE	FALSE	FALSE	No
No	33	Male	Saudi	A+	167	112	36	102	158	116	Negative	Negative	FALSE	FALSE	FALSE	FALSE	FALSE	TRUE	FALSE	FALSE	FALSE	No
No	33	Male	Saudi	O+	170	100	37	86	143	93	Negative	Negative	TRUE	FALSE	TRUE	TRUE	FALSE	TRUE	FALSE	FALSE	TRUE	Yes
No	46	Male	Saudi	O+	177	88	37	79	162	95	Negative	Negative	FALSE	FALSE	FALSE	FALSE	FALSE	FALSE	FALSE	FALSE	FALSE	No
No	45	Male	Non-Saudi	A+	170	63	36	67	160	83	Negative	Negative	FALSE	FALSE	FALSE	FALSE	FALSE	FALSE	FALSE	FALSE	FALSE	No
No	32	Male	Non-Saudi	AB+	180	72	36	90	139	87	Negative	Negative	TRUE	FALSE	TRUE	FALSE	FALSE	FALSE	FALSE	FALSE	TRUE	No
No	19	Male	Saudi	O+	168	82	37	76	149	63	Negative	Negative	FALSE	FALSE	FALSE	FALSE	FALSE	FALSE	FALSE	FALSE	TRUE	No
No	33	Male	Saudi	O+	173	80	37	68	13	89	Positive	Positive	FALSE	FALSE	FALSE	FALSE	FALSE	FALSE	FALSE	FALSE	TRUE	No
No	30	Male	Saudi	O+	165	78	37	66	129	82	Negative	Negative	FALSE	FALSE	FALSE	FALSE	FALSE	FALSE	FALSE	FALSE	FALSE	No
No	30	Male	Saudi	B+	174	75	37	75	137	80	Negative	Negative	FALSE	FALSE	FALSE	FALSE	FALSE	FALSE	FALSE	FALSE	FALSE	No
No	35	Male	Saudi	O+	180	87	36	71	136	84	Negative	Negative	FALSE	FALSE	FALSE	FALSE	FALSE	FALSE	FALSE	FALSE	FALSE	No
No	42	Male	Saudi	B+	166	63	37	66	141	88	Negative	Negative	FALSE	FALSE	FALSE	TRUE	FALSE	FALSE	FALSE	FALSE	FALSE	No
No	46	Male	Saudi	B+	172	88	36	80	153	95	Negative	Negative	FALSE	FALSE	FALSE	FALSE	FALSE	FALSE	FALSE	FALSE	FALSE	No
No	54	Male	Saudi	O+	183	106	36	80	169	100	Negative	Negative	FALSE	FALSE	FALSE	FALSE	FALSE	TRUE	FALSE	FALSE	FALSE	No
No	41	Male	Saudi	O+	180	115	36	69	134	84	Positive	Positive	TRUE	FALSE	TRUE	TRUE	FALSE	TRUE	FALSE	FALSE	TRUE	Yes
No	44	Male	Saudi	O+	180	73	36	64	122	78	Negative	Negative	FALSE	FALSE	FALSE	TRUE	FALSE	FALSE	FALSE	FALSE	TRUE	No
No	33	Male	Saudi	O+	171	88	36	97	130	78	Negative	Negative	FALSE	FALSE	FALSE	FALSE	FALSE	FALSE	FALSE	FALSE	FALSE	No
No	34	Female	Saudi	O+	163	55	37	99	125	63	Negative	Negative	FALSE	FALSE	FALSE	FALSE	FALSE	FALSE	FALSE	FALSE	FALSE	No
No	37	Male	Saudi	O+	164	70	36	100	158	89	Negative	Negative	FALSE	FALSE	FALSE	FALSE	FALSE	FALSE	TRUE	FALSE	FALSE	No
No	52	Male	Saudi	O+	175	99	36	58	132	80	Negative	Negative	FALSE	FALSE	FALSE	FALSE	FALSE	FALSE	FALSE	TRUE	FALSE	No
No	38	Male	Saudi	O+	170	70	37	59	126	79	Negative	Negative	FALSE	FALSE	FALSE	FALSE	FALSE	FALSE	FALSE	FALSE	FALSE	No
No	35	Male	Saudi	O+	179	79	36	89	129	86	Negative	Negative	FALSE	FALSE	FALSE	FALSE	FALSE	FALSE	FALSE	FALSE	FALSE	No
No	25	Male	Saudi	O-	173	76	36	99	132	93	Positive	Positive	TRUE	FALSE	TRUE	TRUE	FALSE	FALSE	FALSE	FALSE	FALSE	No
No	35	Male	Saudi	B+	170	82	36	79	80	60	Negative	Negative	FALSE	FALSE	FALSE	FALSE	FALSE	FALSE	FALSE	FALSE	FALSE	No
No	42	Male	Saudi	O+	170	82	37	65	130	71	Negative	Negative	FALSE	FALSE	FALSE	FALSE	FALSE	FALSE	FALSE	FALSE	FALSE	No
No	33	Female	Saudi	O+	165	64	36	86	126	82	Negative	Negative	FALSE	FALSE	FALSE	TRUE	FALSE	FALSE	FALSE	FALSE	FALSE	No
No	32	Male	Saudi	O+	171	73	36	66	114	71	Negative	Negative	FALSE	FALSE	FALSE	FALSE	FALSE	FALSE	FALSE	FALSE	FALSE	No
No	35	Male	Saudi	AB+	166	92	36	75	145	88	Negative	Negative	FALSE	FALSE	FALSE	FALSE	FALSE	FALSE	FALSE	FALSE	FALSE	No
No	51	Male	Saudi	O+	178	66	36	89	140	98	Negative	Negative	FALSE	FALSE	FALSE	FALSE	FALSE	FALSE	FALSE	FALSE	FALSE	No
No	30	Male	Non-Saudi	O+	170	57	36	87	149	74	Negative	Negative	FALSE	FALSE	FALSE	FALSE	FALSE	FALSE	FALSE	FALSE	FALSE	No
No	28	Male	Saudi	B+	166	60	37	64	134	81	Negative	Negative	FALSE	FALSE	FALSE	FALSE	FALSE	FALSE	FALSE	FALSE	FALSE	No
No	26	Male	Non-Saudi	B-	166	71	36	84	129	74	Negative	Negative	FALSE	FALSE	FALSE	FALSE	FALSE	FALSE	FALSE	FALSE	FALSE	No
No	53	Male	Saudi	AB+	165	100	36	64	186	136	Negative	Negative	FALSE	FALSE	FALSE	FALSE	FALSE	TRUE	FALSE	TRUE	FALSE	No
No	24	Female	Saudi	B+	157	49	36	72	118	70	Negative	Negative	FALSE	FALSE	FALSE	TRUE	FALSE	FALSE	FALSE	FALSE	TRUE	No
No	37	Male	Saudi	O+	176	98	37	80	142	88	Negative	Negative	FALSE	FALSE	FALSE	FALSE	FALSE	FALSE	FALSE	FALSE	TRUE	No
No	53	Male	Saudi	B+	176	91	36	105	123	95	Negative	Positive	FALSE	FALSE	FALSE	FALSE	TRUE	FALSE	FALSE	FALSE	FALSE	No
No	32	Male	Saudi	A+	185	78	37	71	134	86	Negative	Negative	FALSE	FALSE	FALSE	FALSE	FALSE	FALSE	FALSE	FALSE	FALSE	No
No	27	Female	Saudi	O-	164	57	36	97	110	72	Negative	Negative	TRUE	TRUE	TRUE	FALSE	FALSE	FALSE	FALSE	FALSE	TRUE	Yes
No	29	Male	Saudi	O-	161	75	37	58	122	81	Negative	Negative	FALSE	FALSE	FALSE	FALSE	FALSE	FALSE	FALSE	TRUE	FALSE	No
No	36	Male	Saudi	O+	164	75	37	99	142	99	Positive	Positive	FALSE	FALSE	FALSE	FALSE	FALSE	FALSE	FALSE	FALSE	TRUE	Yes
No	31	Male	Saudi	O+	176	98	36	93	139	87	Negative	Negative	FALSE	FALSE	FALSE	FALSE	FALSE	TRUE	FALSE	FALSE	TRUE	No
No	35	Female	Saudi	B+	158	53	36	74	119	72	Negative	Negative	FALSE	FALSE	FALSE	TRUE	FALSE	FALSE	FALSE	FALSE	FALSE	No
No	35	Male	Saudi	B+	167	109	36	81	168	104	Negative	Negative	FALSE	TRUE	FALSE	FALSE	FALSE	TRUE	FALSE	FALSE	FALSE	No
No	61	Male	Saudi	B+	165	61	37	96	147	99	Negative	Negative	FALSE	FALSE	FALSE	FALSE	FALSE	FALSE	FALSE	FALSE	FALSE	No
No	30	Male	Non-Saudi	AB+	170	80	37	60	113	76	Negative	Negative	FALSE	FALSE	FALSE	FALSE	FALSE	FALSE	FALSE	FALSE	FALSE	No
No	58	Male	Non-Saudi	O-	185	107	37	98	168	99	Positive	Positive	FALSE	FALSE	TRUE	FALSE	FALSE	TRUE	FALSE	FALSE	TRUE	Yes
No	36	Male	Saudi	O+	172	87	36	64	142	86	Negative	Negative	FALSE	FALSE	TRUE	FALSE	FALSE	FALSE	FALSE	FALSE	FALSE	Yes
No	36	Male	Saudi	O+	179	79	36	62	136	105	Negative	Negative	FALSE	FALSE	FALSE	FALSE	FALSE	FALSE	FALSE	FALSE	FALSE	No
No	37	Male	Saudi	AB+	170	110	37	78	108	71	Negative	Negative	FALSE	FALSE	FALSE	FALSE	FALSE	FALSE	FALSE	FALSE	FALSE	No
No	53	Male	Saudi	O+	170	105	37	63	109	84	Negative	Negative	FALSE	FALSE	FALSE	TRUE	TRUE	TRUE	TRUE	FALSE	FALSE	No
No	42	Male	Saudi	O+	174	96	37	65	130	84	Negative	Negative	FALSE	FALSE	FALSE	FALSE	FALSE	FALSE	FALSE	FALSE	FALSE	No
No	31	Male	Saudi	O+	175	72	36	66	106	63	Negative	Negative	FALSE	FALSE	FALSE	FALSE	TRUE	FALSE	FALSE	TRUE	TRUE	No
No	36	Male	Saudi	B+	168	77	36	66	128	70	Negative	Negative	FALSE	FALSE	FALSE	FALSE	FALSE	FALSE	FALSE	FALSE	FALSE	No
No	30	Male	Saudi	A+	170	100	36	81	126	84	Negative	Negative	FALSE	TRUE	FALSE	FALSE	FALSE	TRUE	FALSE	TRUE	FALSE	No
No	31	Female	Saudi	AB+	153	70	36	80	133	80	Negative	Negative	FALSE	FALSE	FALSE	FALSE	FALSE	FALSE	FALSE	FALSE	FALSE	No
No	26	Female	Saudi	O-	155	70	36	82	130	82	Negative	Negative	FALSE	FALSE	FALSE	FALSE	FALSE	FALSE	FALSE	TRUE	TRUE	No
No	51	Male	Non-Saudi	A+	170	75	36	79	144	87	Positive	Positive	TRUE	FALSE	FALSE	FALSE	FALSE	FALSE	FALSE	FALSE	FALSE	No
No	27	Female	Saudi	A+	167	75	36	77	142	86	Positive	Positive	FALSE	FALSE	TRUE	FALSE	FALSE	FALSE	FALSE	FALSE	TRUE	Yes
No	25	Female	Saudi	O+	153	55	36	117	101	65	Negative	Negative	FALSE	FALSE	FALSE	FALSE	FALSE	FALSE	FALSE	FALSE	FALSE	No
No	31	Female	Saudi	O-	164	62	36	90	116	70	Negative	Negative	FALSE	FALSE	FALSE	FALSE	FALSE	FALSE	FALSE	FALSE	TRUE	No
No	25	Female	Saudi	B+	150	53	37	80	52	39	Negative	Negative	FALSE	FALSE	FALSE	FALSE	FALSE	FALSE	FALSE	FALSE	TRUE	No
No	25	Male	Saudi	AB+	184	84	36	88	155	111	Negative	Negative	FALSE	FALSE	FALSE	FALSE	FALSE	FALSE	FALSE	FALSE	FALSE	No
No	28	Male	Saudi	B+	168	74	36	92	135	90	Negative	Negative	FALSE	FALSE	FALSE	FALSE	FALSE	FALSE	FALSE	FALSE	TRUE	No
No	29	Male	Saudi	B+	175	70	36	76	148	80	Negative	Negative	FALSE	FALSE	FALSE	FALSE	FALSE	FALSE	FALSE	FALSE	FALSE	No
No	23	Female	Saudi	B+	172	60	36	72	120	81	Negative	Negative	FALSE	FALSE	FALSE	FALSE	FALSE	FALSE	FALSE	FALSE	FALSE	No
No	33	Female	Saudi	O+	149	47	36	83	129	83	Negative	Negative	FALSE	FALSE	FALSE	FALSE	FALSE	FALSE	FALSE	FALSE	FALSE	No
No	31	Female	Saudi	AB+	156	53	36	85	121	82	Negative	Negative	FALSE	FALSE	TRUE	FALSE	FALSE	FALSE	FALSE	FALSE	FALSE	No
No	29	Female	Saudi	O+	153	56	36	93	128	97	Negative	Negative	FALSE	FALSE	FALSE	FALSE	FALSE	FALSE	FALSE	FALSE	FALSE	No
No	26	Female	Saudi	O+	162	55	36	85	132	93	Negative	Negative	FALSE	FALSE	FALSE	FALSE	FALSE	FALSE	FALSE	FALSE	TRUE	No
No	25	Female	Saudi	A+	172	80	36	89	117	79	Negative	Negative	TRUE	FALSE	FALSE	FALSE	FALSE	FALSE	FALSE	TRUE	FALSE	No
No	30	Male	Saudi	O+	180	94	36	69	117	70	Negative	Negative	FALSE	FALSE	FALSE	FALSE	FALSE	FALSE	FALSE	FALSE	FALSE	No
No	29	Female	Non-Saudi	A+	162	64	80	100	123	70	Negative	Negative	FALSE	TRUE	FALSE	FALSE	FALSE	FALSE	FALSE	FALSE	FALSE	No
No	33	Male	Saudi	O+	189	119	36	69	122	65	Negative	Negative	FALSE	FALSE	FALSE	FALSE	FALSE	TRUE	TRUE	FALSE	FALSE	No
No	33	Male	Saudi	O+	163	88	36	105	134	93	Negative	Negative	FALSE	FALSE	FALSE	FALSE	FALSE	FALSE	FALSE	FALSE	FALSE	No
No	29	Male	Saudi	O+	181	75	36	70	145	97	Negative	Negative	FALSE	FALSE	FALSE	FALSE	FALSE	FALSE	FALSE	FALSE	TRUE	No
No	42	Male	Saudi	A+	169	88	36	62	147	92	Negative	Negative	FALSE	FALSE	FALSE	FALSE	FALSE	FALSE	FALSE	FALSE	FALSE	No
No	25	Male	Saudi	A+	175	78	37	64	120	77	Negative	Negative	FALSE	FALSE	FALSE	FALSE	FALSE	FALSE	FALSE	FALSE	TRUE	No
No	25	Male	Saudi	O+	170	85	37	67	138	98	Negative	Negative	FALSE	FALSE	FALSE	FALSE	FALSE	FALSE	FALSE	FALSE	TRUE	No
No	32	Male	Saudi	A+	173	93	37	76	139	71	Negative	Negative	FALSE	FALSE	FALSE	FALSE	FALSE	FALSE	FALSE	FALSE	FALSE	No
No	36	Male	Saudi	B+	176	88	36	68	139	86	Negative	Negative	FALSE	FALSE	FALSE	FALSE	FALSE	FALSE	FALSE	FALSE	TRUE	No
No	25	Male	Saudi	O+	180	100	36	73	147	83	Negative	Negative	FALSE	FALSE	FALSE	FALSE	FALSE	FALSE	FALSE	FALSE	TRUE	No
No	26	Male	Saudi	A+	170	83	36	76	140	81	Negative	Negative	FALSE	FALSE	FALSE	FALSE	FALSE	FALSE	FALSE	FALSE	TRUE	No
No	25	Male	Saudi	O+	171	59	36	115	126	77	Negative	Negative	FALSE	FALSE	FALSE	FALSE	FALSE	FALSE	FALSE	FALSE	TRUE	No
No	30	Male	Saudi	O+	172	70	36	68	120	79	Negative	Negative	FALSE	FALSE	FALSE	FALSE	FALSE	FALSE	FALSE	FALSE	TRUE	No
No	34	Female	Saudi	O+	155	67	37	83	119	82	Negative	Negative	FALSE	FALSE	FALSE	FALSE	FALSE	FALSE	FALSE	FALSE	FALSE	No
No	26	Female	Saudi	AB+	165	55	36	80	112	64	Negative	Negative	FALSE	FALSE	FALSE	FALSE	FALSE	FALSE	FALSE	FALSE	TRUE	No
No	25	Female	Saudi	O+	154	65	37	75	139	86	Negative	Negative	TRUE	FALSE	FALSE	FALSE	FALSE	FALSE	FALSE	FALSE	TRUE	Yes
No	24	Female	Saudi	O+	161	61	37	71	102	67	Negative	Negative	FALSE	FALSE	FALSE	FALSE	FALSE	FALSE	FALSE	FALSE	FALSE	No
No	31	Female	Saudi	B+	152	64	36	97	141	83	Negative	Negative	FALSE	FALSE	FALSE	FALSE	FALSE	FALSE	FALSE	FALSE	FALSE	No
No	26	Female	Saudi	O+	165	71	37	87	134	97	Negative	Negative	FALSE	FALSE	FALSE	FALSE	FALSE	FALSE	FALSE	FALSE	FALSE	No
No	25	Female	Saudi	O+	169	60	37	97	111	66	Negative	Negative	FALSE	FALSE	FALSE	FALSE	FALSE	FALSE	FALSE	FALSE	FALSE	No
No	40	Male	Saudi	A+	170	80	36	73	154	89	Negative	Negative	FALSE	FALSE	FALSE	FALSE	FALSE	FALSE	FALSE	FALSE	FALSE	No
No	27	Female	Saudi	A+	160	54	37	83	116	78	Negative	Negative	FALSE	FALSE	FALSE	FALSE	FALSE	FALSE	FALSE	FALSE	TRUE	No
No	32	Female	Saudi	A+	160	43	37	85	102	68	Positive	Positive	TRUE	TRUE	TRUE	TRUE	FALSE	FALSE	TRUE	TRUE	FALSE	Yes
No	27	Female	Saudi	A+	153	60	37	82	118	69	Negative	Negative	FALSE	FALSE	FALSE	TRUE	FALSE	FALSE	FALSE	FALSE	TRUE	No
No	31	Male	Saudi	B+	177	70	36	84	145	80	Negative	Negative	FALSE	FALSE	FALSE	FALSE	FALSE	FALSE	FALSE	FALSE	FALSE	No
No	55	Male	Non-Saudi	O-	156	65	37	65	166	79	Positive	Positive	FALSE	FALSE	FALSE	FALSE	FALSE	FALSE	FALSE	FALSE	FALSE	No
No	32	Male	Saudi	O+	168	62	37	97	109	68	Negative	Negative	FALSE	FALSE	FALSE	FALSE	FALSE	FALSE	FALSE	FALSE	FALSE	No
No	39	Male	Saudi	O+	178	81	36	81	134	80	Negative	Negative	FALSE	FALSE	FALSE	FALSE	FALSE	FALSE	FALSE	FALSE	FALSE	No
No	42	Male	Non-Saudi	AB+	150	55	37	80	155	103	Negative	Negative	FALSE	FALSE	FALSE	FALSE	FALSE	FALSE	FALSE	FALSE	FALSE	No
No	33	Male	Saudi	A+	172	75	37	78	115	69	Negative	Negative	FALSE	FALSE	FALSE	TRUE	FALSE	FALSE	FALSE	FALSE	FALSE	No
No	26	Male	Saudi	O+	176	95	37	72	129	79	Negative	Negative	FALSE	FALSE	FALSE	FALSE	FALSE	TRUE	FALSE	FALSE	FALSE	No
No	27	Male	Saudi	O+	170	58	37	90	119	71	Negative	Negative	FALSE	FALSE	FALSE	FALSE	FALSE	FALSE	FALSE	FALSE	FALSE	No
No	36	Male	Saudi	A+	165	67	36	76	143	87	Negative	Negative	FALSE	FALSE	FALSE	FALSE	FALSE	FALSE	FALSE	FALSE	FALSE	No
No	47	Male	Non-Saudi	O+	170	85	36	131	157	94	Positive	Positive	FALSE	FALSE	FALSE	FALSE	FALSE	FALSE	FALSE	FALSE	FALSE	No
No	27	Male	Saudi	O+	181	100	36	71	134	75	Negative	Negative	FALSE	FALSE	FALSE	FALSE	FALSE	FALSE	FALSE	FALSE	TRUE	No
No	36	Male	Saudi	A+	172	73	37	64	117	76	Negative	Negative	FALSE	FALSE	FALSE	FALSE	FALSE	FALSE	FALSE	FALSE	FALSE	No
No	35	Male	Saudi	B+	168	60	36	78	113	76	Negative	Negative	FALSE	FALSE	FALSE	FALSE	FALSE	FALSE	FALSE	FALSE	FALSE	No
No	33	Male	Saudi	O+	165	55	36	78	132	67	Negative	Negative	FALSE	FALSE	FALSE	FALSE	FALSE	FALSE	FALSE	FALSE	FALSE	No
No	26	Female	Saudi	B+	179	59	37	100	143	81	Positive	Positive	FALSE	FALSE	FALSE	FALSE	FALSE	FALSE	FALSE	FALSE	TRUE	No
No	27	Male	Saudi	A+	183	87	37	75	136	82	Negative	Negative	FALSE	FALSE	FALSE	FALSE	FALSE	FALSE	FALSE	FALSE	TRUE	No
No	28	Male	Saudi	AB+	173	37	92	100	161	87	Negative	Negative	FALSE	FALSE	FALSE	FALSE	FALSE	FALSE	FALSE	FALSE	TRUE	No
No	28	Male	Saudi	O+	178	91	37	72	114	93	Negative	Negative	FALSE	FALSE	FALSE	FALSE	FALSE	FALSE	FALSE	FALSE	FALSE	No
No	37	Male	Saudi	A+	189	65	37	76	122	81	Negative	Negative	FALSE	FALSE	FALSE	FALSE	FALSE	FALSE	FALSE	FALSE	FALSE	No
No	40	Male	Saudi	O+	179	95	36	85	181	107	Negative	Negative	FALSE	FALSE	FALSE	FALSE	TRUE	FALSE	FALSE	FALSE	FALSE	No
No	46	Male	Saudi	O+	175	85	37	61	133	92	Negative	Negative	FALSE	FALSE	FALSE	FALSE	TRUE	FALSE	FALSE	FALSE	FALSE	No
No	27	Female	Saudi	O+	169	53	36	72	117	76	Negative	Negative	FALSE	FALSE	FALSE	FALSE	FALSE	FALSE	FALSE	FALSE	FALSE	No
No	41	Male	Saudi	O+	184	84	36	91	147	97	Negative	Negative	FALSE	FALSE	FALSE	FALSE	FALSE	FALSE	FALSE	FALSE	FALSE	No
No	29	Male	Saudi	A+	184	100	36	67	142	84	Negative	Negative	FALSE	FALSE	FALSE	FALSE	FALSE	TRUE	FALSE	FALSE	FALSE	No
No	27	Male	Saudi	B+	189	105	36	78	135	85	Negative	Negative	FALSE	FALSE	FALSE	FALSE	FALSE	FALSE	FALSE	FALSE	TRUE	No
No	33	Male	Saudi	O+	181	88	37	66	133	93	Negative	Negative	FALSE	FALSE	FALSE	FALSE	FALSE	FALSE	FALSE	FALSE	FALSE	No
No	34	Male	Saudi	O-	168	73	37	71	115	81	Negative	Negative	FALSE	FALSE	FALSE	FALSE	FALSE	FALSE	FALSE	FALSE	FALSE	No
No	25	Female	Saudi	O-	168	51	36	86	114	72	Positive	Positive	TRUE	FALSE	TRUE	FALSE	FALSE	FALSE	FALSE	FALSE	TRUE	No
No	30	Male	Saudi	O+	171	73	37	94	124	69	Negative	Negative	FALSE	FALSE	FALSE	FALSE	FALSE	FALSE	FALSE	FALSE	TRUE	No
No	47	Male	Saudi	A+	172	64	36	76	114	71	Negative	Negative	FALSE	FALSE	FALSE	FALSE	FALSE	FALSE	FALSE	FALSE	FALSE	No
No	26	Male	Saudi	O+	164	71	36	67	108	71	Negative	Negative	FALSE	FALSE	FALSE	FALSE	FALSE	FALSE	FALSE	FALSE	FALSE	No
No	26	Male	Non-Saudi	A+	167	78	36	70	146	92	Negative	Negative	FALSE	FALSE	FALSE	FALSE	FALSE	FALSE	FALSE	FALSE	FALSE	No
No	30	Male	Saudi	AB+	176	102	36	88	165	91	Negative	Negative	FALSE	FALSE	FALSE	FALSE	FALSE	FALSE	FALSE	FALSE	TRUE	No
No	34	Male	Saudi	O+	179	90	36	72	114	77	Negative	Negative	FALSE	FALSE	FALSE	FALSE	FALSE	FALSE	FALSE	FALSE	TRUE	No
No	27	Female	Saudi	A+	163	57	36	69	110	80	Negative	Negative	FALSE	FALSE	FALSE	FALSE	FALSE	FALSE	FALSE	FALSE	FALSE	No
No	38	Male	Saudi	O-	170	70	36	60	129	73	Negative	Negative	FALSE	FALSE	TRUE	TRUE	FALSE	FALSE	FALSE	FALSE	TRUE	No
No	25	Female	Saudi	O+	160	76	36	82	115	82	Negative	Negative	FALSE	FALSE	FALSE	FALSE	FALSE	FALSE	FALSE	FALSE	TRUE	No
No	26	Female	Saudi	A+	155	57	36	84	126	84	Negative	Negative	FALSE	FALSE	FALSE	FALSE	FALSE	FALSE	FALSE	FALSE	FALSE	No
No	38	Male	Saudi	A+	178	82	36	77	127	76	Negative	Negative	FALSE	FALSE	FALSE	FALSE	FALSE	FALSE	FALSE	FALSE	TRUE	No
No	32	Female	Saudi	O+	159	60	36	85	115	77	Negative	Negative	TRUE	TRUE	TRUE	TRUE	FALSE	FALSE	FALSE	FALSE	TRUE	Yes
No	50	Male	Saudi	O-	150	75	36	65	137	93	Negative	Negative	FALSE	FALSE	FALSE	FALSE	FALSE	FALSE	FALSE	FALSE	FALSE	No
No	24	Female	Saudi	O+	167	64	36	80	129	68	Negative	Negative	TRUE	FALSE	FALSE	TRUE	FALSE	FALSE	FALSE	FALSE	FALSE	No
No	32	Male	Saudi	A+	168	75	37	75	124	75	Negative	Negative	FALSE	FALSE	FALSE	FALSE	FALSE	FALSE	FALSE	FALSE	FALSE	No
No	38	Male	Saudi	B+	178	89	36	81	163	95	Negative	Negative	TRUE	FALSE	FALSE	TRUE	FALSE	FALSE	FALSE	FALSE	FALSE	No
No	41	Male	Saudi	A+	176	89	36	76	111	77	Negative	Negative	FALSE	FALSE	FALSE	FALSE	FALSE	FALSE	FALSE	FALSE	FALSE	No
No	42	Male	Saudi	O+	162	98	36	80	139	83	Negative	Negative	FALSE	FALSE	FALSE	FALSE	FALSE	TRUE	FALSE	TRUE	FALSE	No
No	32	Male	Non-Saudi	AB-	153	82	37	75	159	87	Negative	Negative	FALSE	FALSE	FALSE	FALSE	FALSE	FALSE	FALSE	FALSE	FALSE	No
No	40	Male	Non-Saudi	AB+	170	86	37	86	146	83	Positive	Positive	FALSE	FALSE	FALSE	FALSE	FALSE	FALSE	FALSE	FALSE	FALSE	No
No	32	Female	Saudi	A+	159	90	36	85	107	68	Negative	Negative	FALSE	FALSE	FALSE	FALSE	FALSE	FALSE	FALSE	FALSE	FALSE	No
No	35	Female	Saudi	B+	160	68	37	80	157	90	Negative	Negative	FALSE	FALSE	FALSE	FALSE	FALSE	FALSE	FALSE	FALSE	FALSE	No
No	25	Male	Non-Saudi	A-	170	60	56	0	118	66	Negative	Negative	FALSE	FALSE	FALSE	FALSE	FALSE	FALSE	FALSE	FALSE	FALSE	No
No	39	Male	Saudi	O-	165	80	36	85	136	101	Negative	Negative	FALSE	FALSE	FALSE	FALSE	FALSE	FALSE	FALSE	FALSE	TRUE	No
No	30	Male	Non-Saudi	AB+	170	65	37	67	107	73	Negative	Negative	FALSE	FALSE	FALSE	FALSE	FALSE	FALSE	FALSE	FALSE	FALSE	No
No	25	Male	Saudi	B+	168	89	36	60	146	90	Negative	Negative	FALSE	FALSE	FALSE	FALSE	FALSE	FALSE	FALSE	FALSE	FALSE	No
No	28	Female	Saudi	O+	158	64	36	109	110	75	Negative	Negative	FALSE	FALSE	FALSE	FALSE	FALSE	FALSE	FALSE	FALSE	FALSE	No
No	43	Male	Non-Saudi	O-	170	65	36	63	133	81	Negative	Negative	FALSE	FALSE	FALSE	FALSE	FALSE	FALSE	FALSE	FALSE	FALSE	No
No	40	Male	Non-Saudi	O-	175	80	36	81	124	82	Negative	Negative	TRUE	FALSE	FALSE	FALSE	FALSE	FALSE	FALSE	FALSE	FALSE	No
No	29	Male	Non-Saudi	A-	165	83	36	76	136	86	Negative	Negative	FALSE	FALSE	FALSE	FALSE	FALSE	FALSE	FALSE	FALSE	FALSE	No
No	26	Female	Saudi	O+	150	50	36	89	148	82	Negative	Negative	FALSE	FALSE	FALSE	FALSE	FALSE	FALSE	FALSE	FALSE	FALSE	No
No	31	Male	Saudi	O+	155	59	37	75	136	82	Negative	Negative	FALSE	FALSE	FALSE	FALSE	FALSE	FALSE	FALSE	FALSE	FALSE	No
No	28	Male	Saudi	O+	174	76	37	82	127	86	Negative	Negative	FALSE	FALSE	FALSE	FALSE	FALSE	FALSE	FALSE	FALSE	TRUE	No
No	38	Male	Saudi	O-	175	95	36	59	128	68	Negative	Negative	FALSE	FALSE	FALSE	FALSE	FALSE	FALSE	FALSE	FALSE	FALSE	No
No	26	Male	Saudi	O+	169	62	37	69	121	76	Negative	Negative	FALSE	FALSE	FALSE	FALSE	FALSE	FALSE	FALSE	FALSE	FALSE	No
No	24	Female	Saudi	B+	169	68	37	95	134	86	Negative	Negative	FALSE	FALSE	FALSE	FALSE	FALSE	FALSE	FALSE	FALSE	FALSE	No
No	25	Female	Saudi	A+	160	45	37	73	116	73	Negative	Negative	FALSE	FALSE	FALSE	FALSE	FALSE	FALSE	FALSE	FALSE	FALSE	No
No	40	Male	Non-Saudi	AB+	170	60	36	66	165	85	Negative	Negative	FALSE	FALSE	FALSE	FALSE	FALSE	FALSE	FALSE	FALSE	FALSE	No
No	25	Female	Saudi	O+	155	68	36	80	149	96	Negative	Negative	FALSE	FALSE	FALSE	FALSE	FALSE	FALSE	FALSE	FALSE	FALSE	No
No	25	Male	Saudi	O+	166	65	37	113	156	97	Negative	Negative	FALSE	FALSE	FALSE	FALSE	FALSE	FALSE	FALSE	FALSE	FALSE	No
No	28	Female	Saudi	O+	156	50	36	71	107	60	Negative	Negative	FALSE	FALSE	FALSE	FALSE	FALSE	FALSE	FALSE	FALSE	FALSE	No
No	27	Female	Saudi	A+	150	57	37	93	131	81	Negative	Negative	TRUE	FALSE	FALSE	TRUE	FALSE	FALSE	FALSE	FALSE	TRUE	No
No	40	Male	Saudi	O+	174	76	36	79	129	85	Negative	Negative	FALSE	FALSE	FALSE	FALSE	FALSE	FALSE	FALSE	FALSE	FALSE	No
No	26	Male	Saudi	B+	175	63	36	77	137	91	Negative	Negative	TRUE	FALSE	TRUE	TRUE	FALSE	FALSE	FALSE	FALSE	TRUE	Yes
No	36	Male	Saudi	O+	173	95	36	96	161	85	Negative	Negative	FALSE	FALSE	FALSE	FALSE	TRUE	FALSE	FALSE	FALSE	TRUE	No
No	22	Male	Saudi	O+	178	65	37	69	127	68	Negative	Negative	FALSE	FALSE	FALSE	FALSE	FALSE	FALSE	FALSE	TRUE	FALSE	No
No	28	Female	Saudi	O+	146	51	36	81	110	73	Negative	Negative	FALSE	FALSE	FALSE	FALSE	FALSE	FALSE	FALSE	FALSE	FALSE	No
No	35	Male	Saudi	A+	168	60	37	66	114	62	Negative	Negative	FALSE	FALSE	FALSE	FALSE	FALSE	FALSE	FALSE	FALSE	TRUE	No
No	27	Male	Saudi	O+	170	65	36	73	112	95	Negative	Negative	TRUE	TRUE	FALSE	FALSE	FALSE	FALSE	FALSE	FALSE	FALSE	No
No	33	Male	Saudi	B+	176	110	37	124	136	91	Negative	Negative	FALSE	FALSE	FALSE	FALSE	FALSE	TRUE	FALSE	FALSE	FALSE	No
No	41	Male	Saudi	O+	181	99	36	58	120	82	Negative	Negative	FALSE	FALSE	FALSE	FALSE	FALSE	FALSE	FALSE	FALSE	FALSE	No
No	43	Male	Saudi	O+	164	80	36	72	120	77	Positive	Positive	TRUE	FALSE	FALSE	TRUE	FALSE	FALSE	FALSE	FALSE	FALSE	Yes
No	40	Male	Saudi	O+	173	76	36	90	132	80	Negative	Negative	FALSE	FALSE	FALSE	FALSE	FALSE	FALSE	FALSE	FALSE	FALSE	No
No	34	Male	Saudi	B+	169	88	37	75	142	86	Negative	Negative	FALSE	FALSE	FALSE	FALSE	FALSE	FALSE	FALSE	FALSE	TRUE	No
No	28	Male	Saudi	O+	179	69	37	62	128	69	Negative	Negative	FALSE	FALSE	FALSE	FALSE	FALSE	FALSE	FALSE	FALSE	TRUE	No
No	34	Male	Saudi	O+	171	68	37	89	148	76	Negative	Negative	FALSE	FALSE	FALSE	FALSE	FALSE	FALSE	FALSE	FALSE	FALSE	No
No	25	Male	Saudi	A+	176	81	37	91	106	73	Negative	Negative	FALSE	FALSE	FALSE	FALSE	FALSE	FALSE	FALSE	FALSE	FALSE	No
No	27	Male	Saudi	A+	167	65	37	63	142	82	Negative	Negative	FALSE	FALSE	FALSE	FALSE	FALSE	FALSE	TRUE	FALSE	FALSE	No
No	32	Female	Saudi	B+	153	54	36	91	147	76	Negative	Negative	FALSE	FALSE	FALSE	FALSE	FALSE	FALSE	FALSE	FALSE	FALSE	No
No	29	Female	Saudi	B+	159	56	36	89	118	79	Positive	Positive	TRUE	FALSE	TRUE	TRUE	FALSE	FALSE	FALSE	FALSE	TRUE	No
No	32	Female	Saudi	A+	166	89	36	83	128	72	Positive	Positive	TRUE	FALSE	FALSE	FALSE	FALSE	FALSE	FALSE	FALSE	FALSE	No
No	30	Female	Saudi	O-	158	62	36	92	123	76	Positive	Positive	TRUE	FALSE	TRUE	TRUE	FALSE	FALSE	FALSE	FALSE	TRUE	No
Yes	47	Female	Saudi	A+	164	79	37	88	129	79	Positive	Positive	FALSE	FALSE	FALSE	FALSE	FALSE	FALSE	FALSE	FALSE	TRUE	No
No	36	Male	Saudi	AB+	173	89	36	89	139	86	Negative	Negative	FALSE	FALSE	FALSE	FALSE	FALSE	FALSE	FALSE	FALSE	FALSE	No
No	40	Male	Saudi	O-	171	89	36	96	146	96	Negative	Negative	FALSE	FALSE	FALSE	FALSE	FALSE	FALSE	FALSE	FALSE	FALSE	No
No	42	Male	Saudi	O+	179	89	36	89	135	82	Negative	Negative	TRUE	FALSE	FALSE	TRUE	FALSE	FALSE	FALSE	FALSE	TRUE	No
Yes	26	Female	Saudi	O+	163	89	37	102	132	86	Positive	Positive	FALSE	FALSE	FALSE	FALSE	FALSE	FALSE	FALSE	FALSE	FALSE	No
Yes	34	Female	Non-Saudi	B+	153	62	36	72	118	82	Negative	Negative	FALSE	FALSE	FALSE	FALSE	FALSE	FALSE	FALSE	FALSE	FALSE	No
No	39	Male	Saudi	O+	174	89	36	99	136	89	Negative	Negative	FALSE	FALSE	FALSE	FALSE	FALSE	FALSE	FALSE	FALSE	FALSE	No
No	38	Male	Saudi	O+	179	88	37	103	146	88	Negative	Negative	FALSE	FALSE	FALSE	FALSE	FALSE	FALSE	FALSE	FALSE	FALSE	No
No	41	Male	Saudi	B+	176	79	36	73	136	86	Negative	Negative	TRUE	FALSE	FALSE	FALSE	FALSE	FALSE	FALSE	FALSE	FALSE	No
Yes	46	Female	Saudi	A+	159	63	36	96	117	62	Negative	Negative	FALSE	FALSE	FALSE	FALSE	FALSE	FALSE	FALSE	FALSE	FALSE	No
Yes	32	Female	Non-Saudi	A+	150	48	37	89	118	79	Negative	Negative	TRUE	FALSE	FALSE	TRUE	FALSE	FALSE	FALSE	FALSE	FALSE	No
No	40	Male	Saudi	A-	186	82	36	89	136	78	Negative	Negative	FALSE	FALSE	FALSE	FALSE	FALSE	FALSE	FALSE	FALSE	FALSE	No
No	24	Female	Saudi	A+	159	56	36	88	118	76	Negative	Negative	FALSE	FALSE	FALSE	FALSE	FALSE	FALSE	FALSE	FALSE	FALSE	No
Yes	47	Female	Saudi	AB+	163	82	36	82	108	63	Negative	Negative	FALSE	FALSE	FALSE	FALSE	FALSE	FALSE	FALSE	FALSE	FALSE	No
No	30	Female	Saudi	O+	160	89	36	89	123	82	Negative	Positive	TRUE	FALSE	FALSE	TRUE	FALSE	FALSE	FALSE	FALSE	FALSE	No
Yes	72	Female	Non-Saudi	AB+	155	83	36	94	136	76	Negative	Positive	FALSE	FALSE	FALSE	FALSE	FALSE	FALSE	FALSE	FALSE	FALSE	No
Yes	52	Female	Non-Saudi	AB+	153	50	36	73	118	69	Negative	Negative	FALSE	FALSE	FALSE	FALSE	FALSE	FALSE	FALSE	FALSE	FALSE	No
Yes	37	Female	Saudi	O+	159	64	36	89	126	86	Negative	Negative	TRUE	FALSE	FALSE	TRUE	FALSE	FALSE	FALSE	FALSE	FALSE	No
No	50	Male	Saudi	B+	178	89	36	82	146	96	Negative	Negative	TRUE	FALSE	FALSE	TRUE	FALSE	FALSE	FALSE	FALSE	FALSE	No
Yes	21	Female	Saudi	B+	158	48	36	89	112	63	Positive	Positive	FALSE	FALSE	FALSE	FALSE	FALSE	FALSE	FALSE	FALSE	FALSE	No
Yes	60	Female	Non-Saudi	O-	146	86	36	84	120	84	Negative	Positive	FALSE	FALSE	FALSE	TRUE	FALSE	FALSE	FALSE	FALSE	FALSE	No
No	34	Male	Saudi	B+	173	76	36	78	139	86	Negative	Negative	FALSE	FALSE	FALSE	FALSE	FALSE	FALSE	FALSE	FALSE	TRUE	No
No	27	Male	Saudi	O+	171	76	36	80	136	78	Negative	Positive	FALSE	FALSE	FALSE	FALSE	FALSE	FALSE	FALSE	FALSE	TRUE	No
No	41	Female	Non-Saudi	B+	160	78	37	86	138	86	Negative	Positive	TRUE	FALSE	FALSE	TRUE	FALSE	FALSE	FALSE	FALSE	FALSE	No
Yes	21	Male	Saudi	A+	180	128	36	96	127	86	Positive	Positive	TRUE	FALSE	FALSE	TRUE	FALSE	FALSE	FALSE	FALSE	FALSE	No
Yes	46	Female	Saudi	A+	157	83	36	96	123	86	Positive	Positive	TRUE	FALSE	FALSE	TRUE	FALSE	FALSE	FALSE	FALSE	FALSE	No
Yes	50	Male	Saudi	AB+	173	76	36	89	136	82	Negative	Positive	FALSE	FALSE	FALSE	FALSE	FALSE	FALSE	FALSE	FALSE	FALSE	No
Yes	38	Female	Non-Saudi	O+	165	195	37	78	128	84	Negative	Negative	FALSE	FALSE	FALSE	FALSE	FALSE	TRUE	FALSE	FALSE	FALSE	No
Yes	41	Male	Non-Saudi	O+	153	78	36	74	136	83	Negative	Negative	FALSE	FALSE	FALSE	FALSE	FALSE	FALSE	FALSE	FALSE	FALSE	No
Yes	52	Female	Saudi	O+	165	78	36	89	128	82	Positive	Positive	FALSE	FALSE	FALSE	FALSE	FALSE	FALSE	FALSE	FALSE	TRUE	No
Yes	30	Female	Saudi	A+	150	48	36	70	1253	82	Negative	Negative	FALSE	FALSE	FALSE	FALSE	FALSE	FALSE	FALSE	FALSE	FALSE	No
Yes	26	Male	Saudi	O-	169	62	36	80	123	82	Positive	Positive	FALSE	FALSE	FALSE	FALSE	FALSE	FALSE	FALSE	FALSE	FALSE	No
No	26	Female	Saudi	A+	160	82	36	77	131	79	Negative	Negative	FALSE	FALSE	FALSE	FALSE	FALSE	FALSE	FALSE	FALSE	FALSE	No
No	34	Male	Saudi	O+	181	120	36	75	132	85	Negative	Negative	TRUE	TRUE	TRUE	FALSE	FALSE	TRUE	FALSE	FALSE	TRUE	Yes
No	40	Female	Saudi	A+	164	79	37	82	124	87	Negative	Negative	FALSE	FALSE	FALSE	FALSE	FALSE	FALSE	FALSE	FALSE	FALSE	No
No	23	Female	Saudi	O+	153	47	36	68	109	59	Negative	Negative	FALSE	FALSE	FALSE	FALSE	FALSE	FALSE	FALSE	FALSE	FALSE	No
No	27	Male	Saudi	O+	174	54	36	69	126	67	Negative	Negative	FALSE	FALSE	FALSE	FALSE	FALSE	FALSE	FALSE	FALSE	FALSE	No
No	67	Male	Saudi	O-	164	58	37	76	172	79	Negative	Negative	FALSE	FALSE	FALSE	FALSE	FALSE	FALSE	TRUE	FALSE	FALSE	No
No	37	Male	Saudi	O+	185	94	37	90	126	77	Negative	Negative	FALSE	FALSE	FALSE	FALSE	FALSE	FALSE	FALSE	FALSE	TRUE	No
No	40	Male	Saudi	A+	176	80	37	68	147	84	Negative	Negative	FALSE	FALSE	FALSE	FALSE	TRUE	FALSE	FALSE	TRUE	FALSE	No
No	43	Male	Saudi	A+	174	73	37	72	160	83	Negative	Negative	FALSE	FALSE	FALSE	FALSE	FALSE	FALSE	FALSE	FALSE	TRUE	No
No	35	Male	Saudi	O+	170	75	37	91	152	95	Negative	Negative	FALSE	FALSE	FALSE	FALSE	FALSE	FALSE	FALSE	FALSE	FALSE	No
No	36	Male	Saudi	B-	168	84	37	63	124	83	Negative	Negative	TRUE	FALSE	TRUE	TRUE	FALSE	FALSE	TRUE	FALSE	TRUE	Yes
No	43	Male	Saudi	A-	180	75	37	74	132	91	Negative	Negative	FALSE	FALSE	FALSE	FALSE	FALSE	FALSE	FALSE	FALSE	FALSE	No
No	40	Female	Non-Saudi	A+	170	90	37	67	141	82	Negative	Negative	FALSE	FALSE	FALSE	FALSE	FALSE	FALSE	FALSE	FALSE	FALSE	No
No	28	Male	Saudi	A+	177	70	37	73	140	96	Negative	Negative	FALSE	FALSE	FALSE	FALSE	FALSE	FALSE	FALSE	FALSE	FALSE	No
No	31	Male	Non-Saudi	O+	178	85	37	74	131	81	Negative	Negative	FALSE	FALSE	FALSE	FALSE	FALSE	FALSE	FALSE	FALSE	FALSE	No
No	53	Male	Non-Saudi	B+	173	93	36	89	181	102	Negative	Negative	FALSE	FALSE	FALSE	FALSE	FALSE	FALSE	FALSE	FALSE	FALSE	No
No	37	Male	Non-Saudi	A+	167	73	37	73	144	94	Negative	Negative	FALSE	FALSE	FALSE	FALSE	FALSE	FALSE	FALSE	TRUE	FALSE	No
No	30	Male	Non-Saudi	O+	178	90	36	63	145	91	Negative	Negative	TRUE	FALSE	FALSE	TRUE	FALSE	TRUE	FALSE	FALSE	TRUE	Yes
No	41	Male	Saudi	A-	174	93	36	75	144	100	Negative	Negative	FALSE	FALSE	TRUE	FALSE	TRUE	FALSE	FALSE	FALSE	TRUE	No
No	43	Male	Saudi	O+	179	80	37	69	146	96	Negative	Negative	FALSE	FALSE	FALSE	FALSE	FALSE	FALSE	FALSE	FALSE	FALSE	No
No	47	Male	Non-Saudi	A+	154	57	37	90	163	104	Negative	Negative	FALSE	FALSE	FALSE	FALSE	FALSE	FALSE	TRUE	FALSE	FALSE	No
No	36	Male	Saudi	A+	165	83	37	69	134	79	Negative	Negative	FALSE	FALSE	FALSE	FALSE	FALSE	FALSE	FALSE	FALSE	FALSE	No
No	44	Male	Saudi	O-	160	85	37	76	141	85	Negative	Negative	FALSE	FALSE	FALSE	FALSE	FALSE	FALSE	FALSE	FALSE	TRUE	No
No	38	Male	Non-Saudi	A+	187	128	36	84	173	126	Negative	Negative	FALSE	FALSE	FALSE	FALSE	TRUE	TRUE	FALSE	FALSE	TRUE	No
No	27	Male	Saudi	A+	172	85	37	78	141	81	Negative	Negative	FALSE	FALSE	FALSE	FALSE	FALSE	FALSE	FALSE	FALSE	FALSE	No
No	32	Male	Saudi	O+	179	78	36	73	151	78	Negative	Negative	FALSE	FALSE	FALSE	FALSE	FALSE	FALSE	FALSE	FALSE	FALSE	No
No	33	Male	Saudi	O+	180	100	36	67	121	78	Negative	Negative	FALSE	FALSE	FALSE	FALSE	FALSE	FALSE	FALSE	TRUE	TRUE	No
No	37	Male	Saudi	O+	158	110	37	69	198	117	Negative	Negative	FALSE	FALSE	FALSE	FALSE	FALSE	TRUE	FALSE	FALSE	TRUE	No
No	33	Male	Saudi	A+	174	70	37	66	136	79	Negative	Negative	FALSE	FALSE	FALSE	FALSE	FALSE	FALSE	FALSE	FALSE	FALSE	No
No	37	Male	Saudi	AB+	165	86	36	75	122	78	Negative	Negative	FALSE	FALSE	FALSE	FALSE	FALSE	FALSE	FALSE	FALSE	TRUE	No
No	30	Male	Saudi	O+	164	90	36	115	158	105	Negative	Negative	FALSE	FALSE	FALSE	FALSE	FALSE	TRUE	FALSE	FALSE	FALSE	No
No	42	Male	Saudi	B+	172	79	36	72	121	80	Negative	Negative	FALSE	FALSE	FALSE	FALSE	FALSE	FALSE	TRUE	FALSE	FALSE	No
No	50	Male	Saudi	A+	172	71	37	92	143	91	Negative	Negative	FALSE	FALSE	FALSE	FALSE	FALSE	FALSE	FALSE	FALSE	FALSE	No
No	45	Male	Saudi	O+	173	96	36	68	129	88	Negative	Negative	FALSE	FALSE	FALSE	FALSE	FALSE	FALSE	FALSE	FALSE	FALSE	No
No	37	Male	Saudi	A+	170	77	37	84	143	93	Negative	Negative	FALSE	FALSE	FALSE	FALSE	FALSE	FALSE	FALSE	FALSE	FALSE	No
No	42	Male	Saudi	O+	168	82	36	75	140	86	Negative	Negative	FALSE	FALSE	FALSE	FALSE	FALSE	FALSE	FALSE	FALSE	FALSE	No
No	50	Male	Saudi	AB+	185	76	36	100	153	95	Negative	Negative	FALSE	FALSE	FALSE	FALSE	FALSE	FALSE	FALSE	FALSE	FALSE	No
No	31	Male	Saudi	O+	183	108	37	71	143	91	Negative	Negative	FALSE	FALSE	FALSE	FALSE	FALSE	FALSE	FALSE	TRUE	FALSE	No
No	34	Male	Saudi	A+	170	60	37	67	127	86	Negative	Negative	FALSE	FALSE	FALSE	FALSE	FALSE	FALSE	FALSE	FALSE	FALSE	No
No	38	Male	Saudi	O+	173	95	37	99	123	90	Negative	Negative	FALSE	FALSE	FALSE	FALSE	FALSE	TRUE	FALSE	FALSE	TRUE	No
No	32	Male	Non-Saudi	A+	176	80	36	90	157	10	Negative	Negative	FALSE	FALSE	FALSE	FALSE	FALSE	TRUE	FALSE	FALSE	FALSE	No
No	42	Male	Saudi	O+	170	95	37	67	137	78	Negative	Negative	FALSE	FALSE	FALSE	FALSE	FALSE	FALSE	FALSE	TRUE	TRUE	No
No	41	Male	Saudi	A+	175	88	36	71	128	86	Negative	Negative	FALSE	FALSE	FALSE	FALSE	FALSE	FALSE	FALSE	FALSE	FALSE	No
No	36	Male	Saudi	A+	176	100	37	129	144	91	Negative	Negative	FALSE	FALSE	FALSE	FALSE	FALSE	FALSE	FALSE	FALSE	FALSE	No
No	35	Female	Saudi	O+	162	47	36	110	148	95	Negative	Negative	TRUE	TRUE	TRUE	FALSE	FALSE	FALSE	FALSE	FALSE	TRUE	No
No	34	Male	Non-Saudi	O+	173	75	37	94	138	92	Negative	Negative	FALSE	FALSE	FALSE	FALSE	TRUE	FALSE	FALSE	FALSE	FALSE	No
No	38	Male	Saudi	O+	180	71	37	78	135	74	Negative	Negative	FALSE	FALSE	FALSE	FALSE	FALSE	FALSE	FALSE	FALSE	FALSE	No
No	23	Male	Saudi	O+	166	83	36	99	164	101	Negative	Negative	FALSE	FALSE	FALSE	FALSE	FALSE	FALSE	FALSE	FALSE	FALSE	No
No	35	Male	Saudi	A+	177	100	37	105	180	127	Negative	Negative	FALSE	FALSE	FALSE	FALSE	FALSE	FALSE	FALSE	FALSE	FALSE	No
No	25	Female	Saudi	B+	155	50	36	76	99	67	Negative	Negative	FALSE	FALSE	FALSE	FALSE	FALSE	FALSE	FALSE	FALSE	FALSE	No
No	48	Male	Saudi	B+	170	70	37	66	138	88	Negative	Negative	TRUE	FALSE	FALSE	FALSE	FALSE	FALSE	FALSE	TRUE	TRUE	Yes
No	30	Male	Saudi	O+	179	90	36	85	129	76	Negative	Negative	FALSE	FALSE	FALSE	FALSE	FALSE	FALSE	FALSE	FALSE	FALSE	No
No	31	Male	Saudi	B-	170	60	37	89	123	78	Negative	Negative	TRUE	FALSE	TRUE	FALSE	FALSE	FALSE	FALSE	FALSE	FALSE	No
No	31	Male	Saudi	A+	170	92	36	92	164	93	Negative	Negative	FALSE	FALSE	FALSE	FALSE	FALSE	TRUE	FALSE	FALSE	FALSE	No
No	30	Male	Saudi	B+	173	72	36	73	134	86	Negative	Negative	FALSE	FALSE	FALSE	TRUE	FALSE	FALSE	FALSE	FALSE	TRUE	No
No	34	Male	Saudi	B-	185	90	36	97	157	89	Negative	Negative	FALSE	FALSE	FALSE	FALSE	FALSE	FALSE	FALSE	FALSE	FALSE	No
No	37	Male	Saudi	O+	183	101	36	85	163	97	Negative	Negative	TRUE	FALSE	FALSE	FALSE	FALSE	TRUE	FALSE	FALSE	FALSE	No
No	28	Female	Saudi	O+	154	65	36	101	124	82	Negative	Negative	TRUE	TRUE	FALSE	FALSE	FALSE	FALSE	FALSE	FALSE	TRUE	No
No	38	Male	Saudi	O+	179	108	36	76	153	84	Negative	Negative	FALSE	FALSE	FALSE	FALSE	FALSE	TRUE	FALSE	FALSE	FALSE	No
No	45	Male	Saudi	B+	177	56	36	98	161	96	Negative	Negative	FALSE	FALSE	FALSE	FALSE	FALSE	TRUE	FALSE	FALSE	FALSE	No
No	36	Female	Saudi	B+	161	51	36	91	128	85	Negative	Negative	FALSE	FALSE	FALSE	FALSE	FALSE	FALSE	FALSE	FALSE	FALSE	No
No	22	Female	Saudi	O+	157	59	36	73	126	82	Negative	Negative	FALSE	FALSE	FALSE	FALSE	FALSE	FALSE	FALSE	FALSE	FALSE	No
No	25	Female	Saudi	B+	157	47	36	84	119	79	Negative	Negative	FALSE	FALSE	FALSE	FALSE	FALSE	FALSE	FALSE	FALSE	FALSE	No
No	36	Male	Saudi	O+	176	97	36	109	151	51	Negative	Negative	FALSE	FALSE	FALSE	FALSE	FALSE	TRUE	FALSE	FALSE	TRUE	No
No	41	Male	Saudi	O+	167	78	37	104	163	92	Negative	Negative	FALSE	FALSE	FALSE	FALSE	FALSE	FALSE	FALSE	FALSE	FALSE	No
No	41	Male	Saudi	O+	171	88	37	74	129	82	Negative	Negative	FALSE	FALSE	FALSE	FALSE	FALSE	FALSE	FALSE	FALSE	FALSE	No
No	34	Male	Saudi	O+	167	70	36	82	164	98	Negative	Negative	FALSE	FALSE	FALSE	FALSE	FALSE	FALSE	FALSE	FALSE	FALSE	No
No	40	Male	Saudi	O+	160	82	37	80	157	86	Negative	Negative	FALSE	FALSE	FALSE	FALSE	FALSE	FALSE	FALSE	FALSE	FALSE	No
No	27	Male	Saudi	O+	184	85	37	65	156	103	Negative	Negative	FALSE	FALSE	FALSE	FALSE	FALSE	FALSE	FALSE	FALSE	FALSE	No
No	41	Male	Saudi	O-	179	86	37	73	176	101	Negative	Negative	TRUE	FALSE	FALSE	FALSE	FALSE	FALSE	TRUE	FALSE	FALSE	No
No	35	Male	Saudi	O+	164	75	36	72	135	87	Negative	Negative	FALSE	FALSE	FALSE	FALSE	FALSE	FALSE	FALSE	TRUE	FALSE	No
No	39	Male	Saudi	O+	178	83	36	65	124	76	Negative	Negative	FALSE	FALSE	FALSE	FALSE	FALSE	FALSE	FALSE	TRUE	TRUE	No
No	33	Male	Saudi	O+	160	65	37	57	127	81	Negative	Negative	FALSE	FALSE	FALSE	FALSE	FALSE	FALSE	FALSE	FALSE	FALSE	Yes
No	33	Male	Saudi	O+	192	90	37	78	151	75	Negative	Negative	FALSE	FALSE	FALSE	FALSE	FALSE	FALSE	FALSE	FALSE	TRUE	No
No	28	Male	Saudi	O+	173	82	36	76	133	86	Negative	Negative	FALSE	FALSE	FALSE	FALSE	FALSE	FALSE	FALSE	FALSE	FALSE	No
No	30	Female	Saudi	B+	166	62	37	95	121	81	Negative	Negative	FALSE	FALSE	FALSE	FALSE	FALSE	FALSE	FALSE	FALSE	FALSE	No
No	29	Male	Saudi	O-	171	69	37	73	131	90	Negative	Negative	FALSE	FALSE	FALSE	FALSE	FALSE	FALSE	FALSE	FALSE	FALSE	No
No	31	Male	Saudi	O+	182	85	36	67	136	99	Negative	Negative	FALSE	FALSE	FALSE	FALSE	FALSE	FALSE	FALSE	FALSE	FALSE	No
No	33	Male	Saudi	O+	163	62	37	78	129	76	Negative	Negative	FALSE	FALSE	FALSE	FALSE	FALSE	FALSE	FALSE	FALSE	FALSE	No
No	36	Male	Saudi	B+	160	60	36	76	159	90	Negative	Negative	FALSE	FALSE	FALSE	FALSE	FALSE	FALSE	FALSE	FALSE	FALSE	No
No	27	Male	Saudi	A+	158	53	36	90	108	82	Negative	Negative	FALSE	FALSE	FALSE	FALSE	FALSE	FALSE	FALSE	FALSE	FALSE	No
No	44	Male	Saudi	O+	174	71	37	72	125	85	Negative	Negative	FALSE	FALSE	FALSE	FALSE	FALSE	FALSE	FALSE	FALSE	FALSE	No
No	34	Male	Saudi	A+	176	63	37	67	121	82	Negative	Negative	FALSE	FALSE	FALSE	FALSE	FALSE	FALSE	FALSE	TRUE	FALSE	No
No	22	Female	Saudi	AB+	151	40	36	83	112	83	Negative	Negative	FALSE	FALSE	FALSE	FALSE	FALSE	FALSE	FALSE	FALSE	FALSE	No
No	29	Female	Saudi	A+	159	60	36	106	153	95	Negative	Negative	FALSE	FALSE	FALSE	FALSE	FALSE	FALSE	FALSE	FALSE	FALSE	No
No	23	Female	Saudi	AB+	158	56	37	78	131	85	Negative	Negative	TRUE	TRUE	TRUE	FALSE	FALSE	FALSE	FALSE	FALSE	TRUE	No
No	23	Female	Saudi	O+	154	75	36	80	142	81	Negative	Negative	TRUE	TRUE	FALSE	FALSE	FALSE	FALSE	FALSE	FALSE	FALSE	No
No	33	Male	Saudi	O+	178	98	36	72	143	84	Negative	Negative	FALSE	FALSE	FALSE	TRUE	FALSE	FALSE	FALSE	FALSE	TRUE	No
No	31	Male	Saudi	B+	168	72	37	61	127	71	Negative	Negative	FALSE	FALSE	FALSE	FALSE	FALSE	FALSE	FALSE	FALSE	FALSE	No
No	32	Male	Saudi	B+	174	69	37	71	132	77	Negative	Negative	FALSE	FALSE	FALSE	FALSE	FALSE	FALSE	FALSE	FALSE	FALSE	No
No	38	Male	Saudi	B+	182	79	37	77	121	63	Negative	Negative	FALSE	FALSE	FALSE	FALSE	FALSE	FALSE	FALSE	FALSE	TRUE	No
No	33	Male	Saudi	O+	179	105	36	87	138	88	Negative	Negative	FALSE	FALSE	FALSE	FALSE	FALSE	FALSE	FALSE	FALSE	FALSE	No
No	27	Male	Saudi	O+	179	90	37	99	157	95	Negative	Negative	FALSE	FALSE	FALSE	FALSE	FALSE	FALSE	FALSE	FALSE	FALSE	No
No	34	Female	Saudi	A+	159	53	36	72	107	66	Negative	Negative	FALSE	FALSE	FALSE	FALSE	FALSE	FALSE	FALSE	FALSE	FALSE	No
No	30	Female	Saudi	AB+	149	58	36	66	115	78	Negative	Negative	TRUE	FALSE	FALSE	TRUE	FALSE	FALSE	FALSE	FALSE	TRUE	No
No	38	Female	Saudi	AB+	150	55	37	98	100	65	Negative	Negative	FALSE	FALSE	FALSE	FALSE	FALSE	FALSE	FALSE	FALSE	FALSE	No
No	24	Female	Saudi	A+	163	66	36	78	110	78	Negative	Negative	FALSE	FALSE	FALSE	FALSE	FALSE	FALSE	FALSE	FALSE	FALSE	No
No	27	Female	Saudi	A-	147	92	36	76	131	86	Negative	Negative	FALSE	FALSE	TRUE	TRUE	FALSE	TRUE	FALSE	FALSE	FALSE	No
No	41	Male	Saudi	O+	165	66	36	85	143	88	Negative	Negative	FALSE	FALSE	FALSE	FALSE	FALSE	FALSE	FALSE	FALSE	FALSE	No
No	32	Male	Saudi	O+	179	40	36	52	126	90	Negative	Negative	FALSE	FALSE	FALSE	FALSE	FALSE	FALSE	FALSE	FALSE	FALSE	No
No	32	Female	Saudi	O+	168	85	36	77	122	75	Negative	Negative	FALSE	FALSE	TRUE	FALSE	FALSE	FALSE	FALSE	FALSE	FALSE	No
No	39	Male	Saudi	B+	179	89	36	57	119	73	Negative	Negative	TRUE	FALSE	FALSE	FALSE	FALSE	FALSE	FALSE	FALSE	FALSE	No
No	29	Female	Saudi	B+	155	58	36	81	105	65	Negative	Negative	FALSE	FALSE	FALSE	FALSE	FALSE	FALSE	FALSE	TRUE	FALSE	No
No	44	Male	Saudi	A+	175	80	36	66	134	86	Negative	Negative	FALSE	FALSE	FALSE	FALSE	FALSE	FALSE	TRUE	FALSE	FALSE	No
No	35	Male	Saudi	O+	165	53	36	53	120	79	Negative	Negative	FALSE	FALSE	FALSE	FALSE	FALSE	FALSE	FALSE	FALSE	FALSE	No
No	32	Male	Saudi	AB+	184	80	36	78	130	86	Negative	Negative	FALSE	TRUE	FALSE	FALSE	FALSE	FALSE	FALSE	TRUE	TRUE	No
No	35	Male	Saudi	A+	174	81	36	64	155	93	Negative	Negative	FALSE	FALSE	FALSE	FALSE	FALSE	FALSE	FALSE	FALSE	FALSE	No
No	34	Male	Saudi	O+	170	50	36	74	144	82	Negative	Negative	FALSE	FALSE	TRUE	FALSE	FALSE	FALSE	FALSE	FALSE	FALSE	No
No	33	Male	Saudi	O+	173	82	36	81	153	84	Negative	Negative	FALSE	FALSE	FALSE	FALSE	FALSE	FALSE	FALSE	FALSE	FALSE	No
No	29	Male	Saudi	O+	178	65	36	84	131	75	Negative	Negative	FALSE	FALSE	FALSE	FALSE	FALSE	FALSE	FALSE	FALSE	FALSE	No
No	50	Male	Saudi	O+	167	80	36	57	135	74	Negative	Negative	FALSE	FALSE	FALSE	FALSE	FALSE	FALSE	FALSE	FALSE	FALSE	No
No	27	Male	Saudi	O-	180	93	36	64	141	86	Negative	Negative	FALSE	FALSE	FALSE	FALSE	FALSE	FALSE	FALSE	FALSE	FALSE	No
No	39	Male	Saudi	A+	171	69	36	84	164	95	Negative	Negative	FALSE	FALSE	FALSE	FALSE	FALSE	FALSE	FALSE	FALSE	TRUE	No
No	30	Male	Saudi	B+	170	93	36	79	145	98	Negative	Negative	TRUE	FALSE	FALSE	TRUE	FALSE	FALSE	FALSE	FALSE	FALSE	No
No	35	Male	Saudi	A+	182	91	37	75	109	60	Negative	Negative	FALSE	FALSE	FALSE	FALSE	FALSE	FALSE	FALSE	FALSE	FALSE	No
No	37	Male	Saudi	A+	172	61	36	76	106	69	Negative	Negative	FALSE	FALSE	FALSE	FALSE	FALSE	FALSE	FALSE	FALSE	FALSE	No
No	38	Male	Saudi	AB+	170	50	36	80	125	54	Negative	Negative	TRUE	FALSE	TRUE	FALSE	FALSE	FALSE	FALSE	FALSE	FALSE	Yes
No	33	Male	Saudi	O+	166	50	36	109	132	75	Negative	Negative	FALSE	FALSE	FALSE	FALSE	FALSE	FALSE	FALSE	FALSE	FALSE	No
No	29	Female	Saudi	O+	163	78	36	78	113	81	Negative	Negative	FALSE	FALSE	FALSE	FALSE	FALSE	FALSE	FALSE	FALSE	FALSE	No
No	27	Male	Saudi	O+	188	75	37	86	126	74	Negative	Negative	FALSE	FALSE	FALSE	FALSE	FALSE	FALSE	FALSE	FALSE	FALSE	No
No	48	Male	Saudi	O+	163	88	37	70	147	105	Negative	Negative	FALSE	FALSE	FALSE	FALSE	FALSE	FALSE	TRUE	FALSE	FALSE	No
No	38	Male	Saudi	A+	185	92	37	85	118	71	Negative	Negative	FALSE	FALSE	FALSE	FALSE	FALSE	FALSE	FALSE	FALSE	TRUE	No
No	27	Male	Saudi	O+	167	65	37	77	128	73	Negative	Negative	FALSE	FALSE	FALSE	FALSE	FALSE	FALSE	FALSE	FALSE	TRUE	No
No	40	Male	Saudi	O+	180	100	37	84	154	102	Negative	Negative	FALSE	FALSE	FALSE	FALSE	FALSE	FALSE	FALSE	FALSE	FALSE	No
No	38	Male	Saudi	O+	172	82	37	64	146	96	Negative	Negative	FALSE	FALSE	FALSE	FALSE	FALSE	FALSE	FALSE	FALSE	FALSE	No
No	39	Male	Saudi	O+	171	100	37	76	159	114	Negative	Negative	TRUE	FALSE	TRUE	FALSE	FALSE	FALSE	FALSE	FALSE	TRUE	Yes
No	33	Male	Saudi	B+	175	104	36	62	148	82	Negative	Negative	FALSE	FALSE	FALSE	FALSE	FALSE	FALSE	FALSE	FALSE	FALSE	No
No	33	Male	Saudi	O+	172	69	36	89	123	76	Negative	Negative	FALSE	FALSE	FALSE	FALSE	FALSE	FALSE	FALSE	FALSE	FALSE	No
No	43	Male	Saudi	O+	173	69	36	84	128	86	Positive	Positive	FALSE	FALSE	FALSE	FALSE	FALSE	FALSE	FALSE	FALSE	TRUE	No
No	39	Female	Saudi	O+	153	68	36	86	125	82	Negative	Negative	FALSE	FALSE	FALSE	FALSE	FALSE	FALSE	FALSE	FALSE	FALSE	No

## Sheet: PCR+ patients
Campus Resident	Age (Years)	Gender	Nationality	Blood Type	Height (cm)	Weight (kg)	Body Temperature (Celsius)	HeartRate (BPM)	Blood Pressure Systolic	Blood Pressure Diastolic	Fever	Difficulty Breathing	Loss Of Sense	Muscle Fatigue	Hypertension	Obesity	Diabetes	Asthma	Contact_COVID-True9	Date Affected	Severity	Length of illness (days)	Ab Test date	IgG Antibody Results	IgM Antibody Results	# Days from onset to Ab test
No	57	Male	Saudi	O+	169	77	36	75	137	79	TRUE	FALSE	FALSE	TRUE	TRUE	FALSE	TRUE	FALSE	TRUE	2020-08-20	No treatment needed	5	2020-09-09	Negative	Negative	20
No	37	Male	Saudi	O+	176	90	36	90	125	66	FALSE	FALSE	TRUE	TRUE	FALSE	FALSE	FALSE	FALSE	TRUE	2020-08-09	No treatment needed	10	2020-09-08	Negative	Negative	30
No	37	Female	Non-Saudi	A+	156	57	36	73	92	59	TRUE	TRUE	TRUE	FALSE	FALSE	FALSE	FALSE	FALSE	TRUE	2020-07-16	No treatment needed	15	2020-09-10	Negative	Negative	56
No	33	Female	Saudi	A+	166	68	37	64	100	69	FALSE	FALSE	FALSE	TRUE	FALSE	FALSE	FALSE	FALSE	TRUE	2020-05-10	No treatment needed	14	2020-09-10	Positive	Positive	123
No	55	Male	Saudi	B+	160	75	37	87	126	78	FALSE	FALSE	TRUE	TRUE	FALSE	FALSE	FALSE	TRUE	TRUE	2020-09-02	Home ventilator	14	2020-09-27	Positive	Positive	25
No	29	Male	Saudi	A+	168	71	36	69	121	80	TRUE	FALSE	TRUE	TRUE	FALSE	FALSE	FALSE	FALSE	TRUE	2020-09-15	No treatment needed	14	2020-09-27	Positive	Positive	12
No	47	Male	Saudi	O+	172	72	37	88	157	91	TRUE	FALSE	TRUE	TRUE	FALSE	FALSE	FALSE	FALSE	TRUE	2020-06-28	No treatment needed	5	2020-09-21	Negative	Negative	85
No	31	Male	Saudi	B+	170	104	36	102	158	91	TRUE	FALSE	TRUE	TRUE	FALSE	TRUE	FALSE	FALSE	TRUE	2020-08-25	No treatment needed	10	2020-09-21	Positive	Positive	27
No	36	Male	Saudi	O+	181	95	36	62	132	85	FALSE	TRUE	TRUE	TRUE	FALSE	FALSE	FALSE	TRUE	TRUE	2020-08-10	Home ventilator	10	2020-09-21	Positive	Positive	42
No	38	Male	Saudi	O+	164	70	37	83	159	97	TRUE	FALSE	TRUE	TRUE	TRUE	FALSE	FALSE	TRUE	FALSE	2020-08-15	No treatment needed	10	2020-09-21	Negative	Negative	37
No	40	Male	Saudi	B+	108	104	36	63	142	86	TRUE	TRUE	FALSE	TRUE	FALSE	FALSE	FALSE	FALSE	TRUE	2020-07-17	No treatment needed	10	2020-09-21	Positive	Positive	66
No	49	Male	Saudi	A+	171	80	36	98	166	104	FALSE	FALSE	FALSE	FALSE	FALSE	FALSE	FALSE	FALSE	TRUE	2020-06-08	No treatment needed	0	2020-09-22	Positive	Positive	106
No	57	Male	Non-Saudi	A+	154	57	36	84	180	95	TRUE	FALSE	TRUE	TRUE	FALSE	FALSE	FALSE	FALSE	TRUE	2020-07-13	No treatment needed	3	2020-09-22	Positive	Positive	71
No	35	Male	Saudi	O+	170	90	36	90	140	92	FALSE	FALSE	TRUE	TRUE	FALSE	FALSE	FALSE	FALSE	TRUE	2020-08-25	No treatment needed	2	2020-09-22	Negative	Negative	28
No	36	Male	Saudi	A+	168	62	36	78	132	82	TRUE	FALSE	TRUE	FALSE	FALSE	FALSE	FALSE	FALSE	FALSE	2020-06-11	No treatment needed	4	2020-09-28	Negative	Negative	109
No	37	Female	Saudi	O+	157	59	36	74	105	67	TRUE	TRUE	TRUE	TRUE	FALSE	FALSE	FALSE	FALSE	TRUE	2020-09-09	Hospital respirator	7	2020-10-01	Positive	Positive	22
No	45	Male	Saudi	O-	183	89	36	89	138	89	TRUE	TRUE	TRUE	TRUE	FALSE	FALSE	FALSE	FALSE	TRUE	2020-09-11	Hospital respirator	7	2020-10-01	Positive	Positive	20
No	40	Male	Saudi	O-	163	63	36	89	146	86	FALSE	FALSE	TRUE	FALSE	FALSE	FALSE	FALSE	FALSE	TRUE	2020-06-22	No treatment needed	7	2020-10-06	Positive	Positive	106
No	70	Male	Saudi	B+	172	76	37	81	155	83	FALSE	TRUE	TRUE	TRUE	FALSE	FALSE	FALSE	TRUE	TRUE	2020-06-10	No treatment needed	7	2020-10-04	Positive	Positive	116
No	30	Male	Saudi	O+	165	100	37	84	176	86	TRUE	TRUE	TRUE	TRUE	FALSE	TRUE	FALSE	FALSE	TRUE	2020-08-01	Hospital respirator	14	2020-10-04	Positive	Positive	64
No	24	Male	Saudi	A+	170	62	37	66	143	83	TRUE	FALSE	TRUE	TRUE	FALSE	FALSE	FALSE	FALSE	FALSE	2020-07-13	No treatment needed	10	2020-10-04	Positive	Positive	83
No	55	Female	Saudi	O+	172	80	37	65	161	89	TRUE	FALSE	FALSE	TRUE	FALSE	FALSE	FALSE	FALSE	TRUE	2020-09-15	No treatment needed	10	2020-10-04	Positive	Positive	19
No	33	Male	Saudi	O+	170	100	37	86	143	93	TRUE	FALSE	TRUE	TRUE	FALSE	TRUE	FALSE	FALSE	TRUE	2020-07-24	No treatment needed	5	2020-10-04	Negative	Negative	72
No	41	Male	Saudi	O+	180	115	36	69	134	84	TRUE	FALSE	TRUE	TRUE	FALSE	TRUE	FALSE	FALSE	TRUE	2020-08-17	No treatment needed	14	2020-09-30	Positive	Positive	44
No	27	Female	Saudi	O-	164	57	36	97	110	72	TRUE	TRUE	TRUE	FALSE	FALSE	FALSE	FALSE	FALSE	TRUE	2020-07-25	Hospital respirator	7	2020-09-30	Negative	Negative	67
No	36	Male	Saudi	O+	164	75	37	99	142	99	FALSE	FALSE	FALSE	FALSE	FALSE	FALSE	FALSE	FALSE	TRUE	2020-07-20	No treatment needed	0	2020-09-30	Positive	Positive	72
No	58	Male	Non-Saudi	O-	185	107	37	98	168	99	FALSE	FALSE	TRUE	FALSE	FALSE	TRUE	FALSE	FALSE	TRUE	2020-07-02	Home ventilator	5	2020-09-30	Positive	Positive	90
No	36	Male	Saudi	O+	172	87	36	64	142	86	FALSE	FALSE	TRUE	FALSE	FALSE	FALSE	FALSE	FALSE	FALSE	2020-06-12	No treatment needed	7	2020-09-30	Negative	Negative	110
No	27	Female	Saudi	A+	167	75	36	77	142	86	FALSE	FALSE	TRUE	FALSE	FALSE	FALSE	FALSE	FALSE	TRUE	2020-07-05	No treatment needed	4	2020-09-30	Positive	Positive	87
No	25	Female	Saudi	O+	154	65	37	75	139	86	TRUE	FALSE	FALSE	FALSE	FALSE	FALSE	FALSE	FALSE	TRUE	2020-07-22	No treatment needed	7	2020-09-29	Negative	Negative	69
No	32	Female	Saudi	A+	160	43	37	85	102	68	TRUE	TRUE	TRUE	TRUE	FALSE	FALSE	TRUE	TRUE	FALSE	2020-09-07	Hospital respirator	14	2020-09-29	Positive	Positive	22
No	32	Female	Saudi	O+	159	60	36	85	115	77	TRUE	TRUE	TRUE	TRUE	FALSE	FALSE	FALSE	FALSE	TRUE	2020-06-22	No treatment needed	11	2020-09-28	Negative	Negative	98
No	26	Male	Saudi	B+	175	63	36	77	137	91	TRUE	FALSE	TRUE	TRUE	FALSE	FALSE	FALSE	FALSE	TRUE	2020-08-13	No treatment needed	7	2020-09-28	Negative	Negative	46
No	43	Male	Saudi	O+	164	80	36	72	120	77	TRUE	FALSE	FALSE	TRUE	FALSE	FALSE	FALSE	FALSE	FALSE	2020-09-10	No treatment needed	10	2020-09-28	Positive	Positive	18
No	34	Male	Saudi	O+	181	120	36	75	132	85	TRUE	TRUE	TRUE	FALSE	FALSE	TRUE	FALSE	FALSE	TRUE	2020-06-11	Home ventilator	14	2020-09-29	Negative	Negative	110
No	36	Male	Saudi	B-	168	84	37	63	124	83	TRUE	FALSE	TRUE	TRUE	FALSE	FALSE	TRUE	FALSE	TRUE	2020-08-07	No treatment needed	10	2020-10-14	Negative	Negative	68
No	30	Male	Non-Saudi	O+	178	90	36	63	145	91	TRUE	FALSE	FALSE	TRUE	FALSE	TRUE	FALSE	FALSE	TRUE	2020-06-14	No treatment needed	7	2020-10-14	Negative	Negative	122
No	48	Male	Saudi	B+	170	70	37	66	138	88	TRUE	FALSE	FALSE	FALSE	FALSE	FALSE	FALSE	TRUE	TRUE	2020-08-17	No treatment needed	4	2020-10-13	Negative	Negative	57
No	33	Male	Saudi	O+	160	65	37	57	127	81	FALSE	FALSE	FALSE	FALSE	FALSE	FALSE	FALSE	FALSE	FALSE	2020-08-21	No treatment needed	0	2020-10-13	Negative	Negative	53
No	38	Male	Saudi	A+	170	50	36	80	125	54	TRUE	FALSE	TRUE	FALSE	FALSE	FALSE	FALSE	FALSE	FALSE	2020-06-13	No treatment needed	7	2020-10-11	Negative	Negative	120
No	39	Male	Saudi	O+	171	100	37	76	159	114	TRUE	FALSE	TRUE	FALSE	FALSE	FALSE	FALSE	FALSE	TRUE	2020-06-10	No treatment needed	7	2020-10-11	Negative	Negative	123
Yes	43	Male	Non-Saudi	O-	172	89	36	74	136	86	TRUE	FALSE	TRUE	TRUE	FALSE	FALSE	FALSE	FALSE	FALSE	2020-06-10	No treatment needed	3	2020-10-10	Negative	Negative	122
